# Supplementary material for: Socioeconomic inequalities in access to skilled birth attendance among urban and rural women in low-income and middle-income countries
Source: PubMed Central journal article supplement (PMC6278921; doi:10.1136/bmjgh-2018-000898), 2018-12-01
Supplement: bmjgh-2018-000898supp001.pdf [file bmjgh-2018-000898supp001.pdf]

**Supplementary Table S1: Indicators of coverage and inequality in the 79 countries.**

| Country-Year     | Place of residence | SBA (%) | Coverage (%) and number of deliveries by wealth quintile |             |             |             |             | SII  | CIX  | P-value for urban minus rural women | P-value for urban minus rural poorest | P-value for SII urban minus SII rural | P-value for CIX urban minus CIX rural | Interaction p-value |
|------------------|--------------------|---------|----------------------------------------------------------|-------------|-------------|-------------|-------------|------|------|-------------------------------------|---------------------------------------|---------------------------------------|---------------------------------------|---------------------|
|                  |                    |         | Poorest                                                  | Second      | Third       | Fourth      | Richest     |      |      |                                     |                                       |                                       |                                       |                     |
| Afghanistan 2015 | urban              | 68.9    | 47.5 (291)                                               | 69.1 (238)  | 72.5(344)   | 67.8 (1315) | 87.8 (2540) | 36.6 | 7.3  | p=0.007                             | p<0.001                               | p=0.016                               | p<0.001                               | p<0.001             |
|                  | rural              | 53.9    | 26.0 (3156)                                              | 38.9 (4237) | 46.2 (4025) | 68.8 (2965) | 89.7 (280)  | 53.3 | 21.0 |                                     |                                       |                                       |                                       |                     |
| Algeria 2012     | urban              | 97.7    | 97.5 (339)                                               | 96.9 (673)  | 97.7 (938)  | 97.8 (1011) | 98.6 (859)  | 1.7  | 0.3  | p=0.20                              | p=0.003                               | p=0.42                                | p=0.13                                | p<0.001             |
|                  | rural              | 95.8    | 93.5 (1073)                                              | 96.3 (579)  | 94.0 (300)  | 95.4 (150)  | 100.0 (56)  | 3.5  | 0.8  |                                     |                                       |                                       |                                       |                     |
| Armenia 2010     | urban              | 99.8    | 100.0 (16)                                               | 99.7 (91)   | 100.0 (158) | 99.1 (202)  | 100.0 (137) | 0.1  | 0.1  | p=0.65                              | p=1.00                                | p=0.76                                | p=0.08                                | p=1.00              |
|                  | rural              | 100.0   | 100.0 (149)                                              | 100.0 (115) | 100.0 (45)  | 100.0 (21)  | 100.0 (4)   | 0.0  | 0.0  |                                     |                                       |                                       |                                       |                     |
| Bangladesh 2014  | urban              | 47.1    | 18.4 (130)                                               | 41.6 (118)  | 47.1 (192)  | 51.8 (424)  | 76.8 (644)  | 57.0 | 18.6 | p=0.18                              | p=0.86                                | p=0.37                                | p=0.003                               | p=0.21              |
|                  | rural              | 41.2    | 17.9 (883)                                               | 28.9 (785)  | 37.3 (711)  | 52.0 (558)  | 70.0 (289)  | 52.1 | 25.8 |                                     |                                       |                                       |                                       |                     |
| Barbados 2012    | urban              | 98.5    | 100.0 (22)                                               | 92.3 (18)   | 100.0 (16)  | 100.0 (15)  | 100.0 (14)  | 3.3  | 0.4  | p=0.73                              | p=1.00                                | p=0.09                                | p=0.17                                | p=0.999             |
|                  | rural              | 100.0   | 100.0 (11)                                               | 100.0 (11)  | 100.0 (13)  | 100.0 (12)  | 100.0 (14)  | 0.0  | 0.0  |                                     |                                       |                                       |                                       |                     |

|                           |       |       |                       |                       |                  |                      |                     |      |      |         |         |         |         |          |
|---------------------------|-------|-------|-----------------------|-----------------------|------------------|----------------------|---------------------|------|------|---------|---------|---------|---------|----------|
| Belarus<br>2012           | urban | 99.9  | 100.0 (44)            | 100.0<br>(120)        | 99.7<br>(190)    | 100.0<br>(264)       | 100.0<br>(371)      | 0.2  | 0.0  | p=0.84  | p=1.00  | p=0.27  | p=0.26  | p=1.00   |
|                           | rural | 100.0 | 100.0<br>(133)        | 100.0<br>(125)        | 100.0<br>(46)    | 100.0<br><b>(23)</b> | 100.0<br><b>(8)</b> | 0.0  | 0.0  |         |         |         |         |          |
| Belize<br>2011            | urban | 98.6  | 100.0 (25)            | 98.2 (52)             | 97.3 (61)        | 99.0 (60)            | 98.5 (50)           | -0.1 | -0.1 | p=0.42  | p=0.001 | p=0.012 | p=0.004 | p=0.03   |
|                           | rural | 96.3  | 87.5 (188)            | 98.6 (99)             | 97.9 (72)        | 100 (66)             | 97.3 (30)           | 19.7 | 3.2  |         |         |         |         |          |
| Benin<br>2011             | urban | 85.7  | 64.5 (389)            | 80.6<br>(286)         | 87.5<br>(380)    | 97.3<br>(814)        | 98.8<br>(1107)      | 34.3 | 5.3  | p=0.78  | p=0.70  | p=0.70  | p=0.038 | p=0.78   |
|                           | rural | 85.0  | 66 (1396)             | 79.3<br>(1400)        | 85.1<br>(1268)   | 95.8<br>(704)        | 99 (128)            | 36.6 | 7.6  |         |         |         |         |          |
| Bhutan<br>2010            | urban | 79.2  | <b>100.0 (1)</b>      | <b>31.1 (4)</b>       | 85.8 (70)        | 84.3<br>(218)        | 94.9<br>(264)       | 18.9 | 3.8  | p=0.007 | p<0.001 | p<0.001 | p<0.001 | p<0.001  |
|                           | rural | 62.6  | 34.1 (510)            | 43.2<br>(529)         | 63.1<br>(457)    | 76.8<br>(277)        | 95.7<br>(265)       | 61.2 | 20.5 |         |         |         |         |          |
| Bosnia &<br>Herz.<br>2011 | urban | 100.0 | <b>100.0<br/>(12)</b> | <b>100.0<br/>(22)</b> | 100.0<br>(38)    | 100.0<br>(560)       | 100.0<br>(115)      | 0.0  | 0.0  | p=0.55  | p=1.00  | p=0.23  | p=0.23  | p=1.00   |
|                           | rural | 99.9  | 100.0<br>(100)        | 99.6<br>(128)         | 100.0<br>(114)   | 100.0<br>(83)        | 100.0<br>(50)       | 0.2  | 0.0  |         |         |         |         |          |
| Burkina Faso<br>2010      | urban | 88.1  | 72.7 (71)             | 85.7 (99)             | 88.7<br>(180)    | 96 (474)             | 97.2<br>(1163)      | 10.7 | 1.8  | p=0.001 | p<0.001 | p<0.001 | p<0.001 | p=0.0002 |
|                           | rural | 71.6  | 50.4<br>(1626)        | 63.5<br>(1779)        | 73 (1825)        | 80.5<br>(1491)       | 90.7<br>(294)       | 40.3 | 10.1 |         |         |         |         |          |
| Burundi<br>2010           | urban | 82.6  | <b>76.4 (18)</b>      | <b>84.8 (13)</b>      | <b>79.6 (14)</b> | 78.6 (25)            | 93.6<br>(329)       | 21.9 | 4.2  | p<0.001 | p<0.001 | p=1.00  | p=0.15  | p=0.46   |
|                           | rural | 64.0  | 54.9 (988)            | 58.5<br>(1028)        | 64.1<br>(982)    | 66 (957)             | 76.7<br>(545)       | 21.8 | 5.9  |         |         |         |         |          |
| CAR<br>2010               | urban | 74.2  | 63.9 (135)            | 63.4<br>(164)         | 66.7<br>(301)    | 84 (461)             | 93.1<br>(385)       | 37.5 | 7.5  | p<0.001 | p<0.001 | p=0.027 | p=0.15  | p=0.096  |
|                           | rural | 41.4  | 29.9 (900)            | 36.2<br>(964)         | 45.4<br>(784)    | 46.5<br>(357)        | 49 (94)             | 23.5 | 10.7 |         |         |         |         |          |

|                           |       |      |                |                |                |                |                |      |      |         |         |         |         |         |
|---------------------------|-------|------|----------------|----------------|----------------|----------------|----------------|------|------|---------|---------|---------|---------|---------|
| Cambodia<br>2014          | urban | 94.5 | 82.2 (11)      | 95.1 (15)      | 98.4 (29)      | 97.5 (88)      | 99.1<br>(511)  | 5.2  | 0.7  | p=0.34  | p=0.34  | p<0.001 | p<0.001 | p=0.67  |
|                           | rural | 92.2 | 79 (1037)      | 90.8<br>(831)  | 95.2<br>(841)  | 98 (707)       | 98.1<br>(369)  | 27.4 | 4.7  |         |         |         |         |         |
| Chad<br>2014              | urban | 36.7 | 15.4 (252)     | 41.4 (58)      | 18.7 (76)      | 38.2<br>(214)  | 69.9<br>(1677) | 68.8 | 18.0 | p<0.001 | p=0.76  | p<0.001 | p<0.001 | p=0.06  |
|                           | rural | 19.1 | 14.6<br>(1790) | 18.5<br>(2096) | 18.2<br>(2126) | 17.6<br>(2040) | 26.6<br>(221)  | 4.6  | 3.9  |         |         |         |         |         |
| Colombia<br>2015          | urban | 98.9 | 97.8 (516)     | 99.3<br>(1867) | 99.2<br>(1268) | 99.2<br>(698)  | 99.0<br>(382)  | 0.1  | 0.0  | p=0.07  | p<0.001 | p<0.001 | p<0.001 | p<0.001 |
|                           | rural | 97.2 | 86.5<br>(1846) | 99.5<br>(305)  | 100.0<br>(11)  | 100.0 (6)      | 100.0 (4)      | 51.5 | 7.6  |         |         |         |         |         |
| Comoros<br>2012           | urban | 92.1 | 82.2 (93)      | 86.4<br>(113)  | 94.4<br>(125)  | 99.1<br>(149)  | 98.4<br>(192)  | 20.2 | 3.3  | p=0.020 | p<0.001 | p=0.009 | p<0.001 | p=0.13  |
|                           | rural | 83.1 | 63.9 (427)     | 78.6<br>(298)  | 89.6<br>(257)  | 91.7<br>(175)  | 91.8<br>(121)  | 39.5 | 8.4  |         |         |         |         |         |
| Congo D. R.<br>2013       | urban | 89.2 | 81.6 (320)     | 84.7<br>(187)  | 88.9<br>(358)  | 92.8<br>(1057) | 97.8<br>(1479) | 16.3 | 2.6  | p=0.022 | p<0.001 | p=0.016 | p<0.001 | p=0.02  |
|                           | rural | 80.4 | 65.5<br>(2733) | 71.9<br>(2333) | 78 (1995)      | 91.6<br>(897)  | 94.8 (43)      | 28.9 | 6.4  |         |         |         |         |         |
| Costa Rica<br>2011        | urban | 99.2 | 99.7 (93)      | 99.5<br>(211)  | 99.5 (89)      | 97.1 (760)     | 100 (61)       | -0.6 | 0.0  | p=0.59  | p=0.048 | p=0.11  | p=0.05  | p=0.18  |
|                           | rural | 97.8 | 95.2 (208)     | 98.6 (98)      | 100.0<br>(58)  | 100.0<br>(39)  | 95.2 (21)      | 7.2  | 1.6  |         |         |         |         |         |
| Dominican<br>Rep.<br>2014 | urban | 98.8 | 98.0 (996)     | 99.4<br>(1121) | 99.5<br>(1064) | 98.3<br>(920)  | 98.9<br>(806)  | 0.2  | 0.1  | p=0.94  | p=0.90  | p=0.16  | p=0.27  | p=0.65  |
|                           | rural | 98.8 | 97.8<br>(1457) | 98.1<br>(580)  | 99.4<br>(323)  | 99.1<br>(207)  | 99.4 (92)      | 2.2  | 0.4  |         |         |         |         |         |
| El Salvador<br>2014       | urban | 99.0 | 97.6 (120)     | 98.6<br>(196)  | 99.6<br>(297)  | 99.5<br>(391)  | 99.5<br>(362)  | 1.8  | 0.3  | p=0.25  | p=0.013 | p=0.002 | p<0.001 | p=0.052 |

|                           |       |      |                |                |               |               |                |      |      |         |         |         |         |         |
|---------------------------|-------|------|----------------|----------------|---------------|---------------|----------------|------|------|---------|---------|---------|---------|---------|
|                           | rural | 97.6 | 92.4 (477)     | 97.6<br>(345)  | 98.7<br>(209) | 99.1 (65)     | 100.0(19)      | 12.7 | 2.1  |         |         |         |         |         |
| Ethiopia<br>2011          | urban | 22.8 | 11.4 (58)      | 11.3 (14)      | 2.5 (16)      | 27.2 (94)     | 61.8<br>(1008) | 71.4 | 27.0 | p<0.001 | p<0.001 | p<0.001 | p=0.64  | p=0.57  |
|                           | rural | 7.4  | 2.7 (1972)     | 3.8<br>(1182)  | 4.1<br>(1079) | 7.8 (986)     | 18.7<br>(292)  | 9.4  | 29.9 |         |         |         |         |         |
| Gabon<br>2012             | urban | 93.6 | 87.2 (648)     | 94.1<br>(683)  | 95.9<br>(428) | 95.1<br>(363) | 95.5<br>(257)  | 6.5  | 1.2  | p=0.004 | p<0.001 | p<0.001 | p<0.001 | p<0.001 |
|                           | rural | 83.9 | 66 (1161)      | 78.2<br>(174)  | 77.6 (89)     | 97.6 (33)     | 100.0<br>(17)  | 33.6 | 9.5  |         |         |         |         |         |
| Gambia<br>2013            | urban | 73.8 | 72.6 (97)      | 74.2<br>(109)  | 66.7<br>(250) | 73.4<br>(646) | 82.1<br>(632)  | 17.1 | 3.8  | p=0.001 | p<0.001 | p=0.002 | p=0.007 | p=0.77  |
|                           | rural | 43.7 | 44.9<br>(1161) | 42.7<br>(1231) | 38.9<br>(834) | 33.4<br>(165) | 58.5 (13)      | -9.5 | -3.8 |         |         |         |         |         |
| Ghana<br>2014             | urban | 84.2 | 69.4 (127)     | 73.1<br>(135)  | 86.2<br>(315) | 94.5<br>(439) | 97.6<br>(446)  | 27.0 | 4.6  | p=0.06  | p<0.001 | p=0.016 | p<0.001 | p=0.001 |
|                           | rural | 75.7 | 48.5<br>(1033) | 61.8<br>(666)  | 71.6<br>(338) | 96.5<br>(111) | 100.0 (8)      | 47.1 | 13.2 |         |         |         |         |         |
| Guatemala<br>2014         | urban | 77.8 | 49.2 (206)     | 67.4<br>(303)  | 82.0<br>(506) | 92.9<br>(747) | 97.6<br>(775)  | 47.4 | 9.0  | p=0.03  | p=0.008 | p=0.004 | p<0.001 | p=0.10  |
|                           | rural | 70.3 | 38.7<br>(1841) | 54.6<br>(1437) | 76.9<br>(970) | 90.9<br>(534) | 90.5<br>(155)  | 63.0 | 19.5 |         |         |         |         |         |
| Guinea<br>2012            | urban | 63.9 | 52.2 (23)      | 28.2 (29)      | 68.7 (79)     | 78.6<br>(535) | 91.6<br>(593)  | 35.3 | 6.5  | p=0.014 | p<0.001 | p=0.42  | p<0.001 | p<0.001 |
|                           | rural | 48.2 | 19.5 (997)     | 28.2<br>(807)  | 38.5<br>(787) | 54.9<br>(383) | 100 (2)        | 41.8 | 23.0 |         |         |         |         |         |
| Guinea-<br>Bissau<br>2014 | urban | 61.9 | 45.6 (35)      | 58.2 (76)      | 47.8<br>(180) | 74.6<br>(292) | 83.3<br>(236)  | 40.8 | 9.1  | p=0.002 | p<0.001 | p=0.003 | p=0.94  | p=0.051 |
|                           | rural | 40.4 | 25.3 (938)     | 27 (683)       | 30.3<br>(569) | 49.6<br>(167) | 69.9 (20)      | 17.5 | 9.4  |         |         |         |         |         |

|                    |       |      |                |                |                |                |                |      |      |         |         |         |         |         |
|--------------------|-------|------|----------------|----------------|----------------|----------------|----------------|------|------|---------|---------|---------|---------|---------|
| Guyana<br>2014     | urban | 99.7 | 98.5 (41)      | 100.0<br>(53)  | 100.0<br>(52)  | 100.0<br>(56)  | 100.0<br>(56)  | 1.3  | 0.2  | p=0.045 | p<0.001 | p<0.001 | p<0.001 | p<0.001 |
|                    | rural | 93.5 | 76.3 (417)     | 94.6<br>(189)  | 96.4<br>(156)  | 100 (116)      | 100.0<br>(122) | 40.5 | 7.2  |         |         |         |         |         |
| Honduras<br>2011   | urban | 91.6 | 79.9 (115)     | 88.8<br>(274)  | 93.6<br>(580)  | 97.4<br>(719)  | 98.2<br>(607)  | 13.6 | 2.3  | p=0.004 | p<0.001 | p<0.001 | p<0.001 | p<0.001 |
|                    | rural | 85.0 | 59.5<br>(2078) | 81.7<br>(1293) | 89.5<br>(638)  | 95.6<br>(297)  | 98.6<br>(123)  | 51.4 | 12.0 |         |         |         |         |         |
| Indonesia<br>2012  | urban | 90.1 | 75.3 (527)     | 90.1<br>(805)  | 92.5<br>(1074) | 95.3<br>(1266) | 97.3<br>(1265) | 15.7 | 2.8  | p=0.012 | p<0.001 | p<0.001 | p<0.001 | p<0.001 |
|                    | rural | 84.2 | 57.8<br>(2758) | 81.1<br>(1420) | 89.1<br>(904)  | 95.2<br>(580)  | 97.8<br>(313)  | 52.8 | 12.4 |         |         |         |         |         |
| Iraq<br>2011       | urban | 92.9 | 85.4<br>(1111) | 91.2<br>(1811) | 95.7<br>(1865) | 96.2<br>(1623) | 96 (1348)      | 10.1 | 1.7  | p=0.016 | p=0.009 | p=0.16  | p=0.009 | p=0.23  |
|                    | rural | 88.2 | 80.6<br>(3476) | 87 (1452)      | 87.4<br>(756)  | 90.7<br>(397)  | 95.2<br>(135)  | 15.1 | 3.3  |         |         |         |         |         |
| Jamaica<br>2011    | urban | 99.8 | 100.0 (63)     | 99.2 (80)      | 100.0<br>(88)  | 100.0<br>(73)  | 100.0<br>(78)  | 0.5  | 0.1  | p=0.74  | p=0.042 | p=0.07  | p=0.048 | p=0.999 |
|                    | rural | 99.0 | 94.9 (93)      | 100.0<br>(60)  | 100.0(45)      | 100.0<br>(33)  | 100.0<br>(17)  | 9.7  | 1.2  |         |         |         |         |         |
| Jordan<br>2012     | urban | 99.5 | 98.4<br>(1119) | 100.0<br>(994) | 100.0<br>(904) | 99.1<br>(765)  | 100.0<br>(393) | 1.2  | 0.2  | p=0.67  | p=0.31  | p=0.69  | p=0.72  | p=0.35  |
|                    | rural | 99.9 | 99.4 (512)     | 99.9<br>(660)  | 100.0<br>(488) | 100.0<br>(223) | 100.0<br>(49)  | 0.7  | 0.1  |         |         |         |         |         |
| Kazakhstan<br>2015 | urban | 99.4 | 100 (75)       | 98.5 (82)      | 99.6<br>(257)  | 99.2<br>(363)  | 99.7<br>(355)  | 0.4  | 0.0  | p=0.89  | p=0.14  | p=0.32  | p=0.33  | p=0.33  |
|                    | rural | 99.3 | 99.6 (275)     | 99.2<br>(285)  | 99.3<br>(215)  | 98.2 (61)      | 100.0<br>(14)  | -0.7 | -0.2 |         |         |         |         |         |
| Kenya<br>2014      | urban | 72.0 | 48 (565)       | 66 (533)       | 66.1<br>(542)  | 86 (942)       | 93.8<br>(1491) | 44.0 | 8.3  | p=0.005 | p<0.001 | p<0.001 | p<0.001 | p<0.001 |

|                    |       |      |                |                |                |                |                |      |      |         |         |        |         |         |
|--------------------|-------|------|----------------|----------------|----------------|----------------|----------------|------|------|---------|---------|--------|---------|---------|
|                    | rural | 63.8 | 32.6<br>(3713) | 52.2<br>(2028) | 66.7<br>(1527) | 82.2<br>(884)  | 85.2<br>(218)  | 60.1 | 20.9 |         |         |        |         |         |
| Kosovo<br>2013     | urban | 98.6 | 95.2 (29)      | 100.0(24)      | 100.0<br>(42)  | 97.6 (56)      | 100.0<br>(86)  | 3.0  | 0.6  | p=0.74  | p=0.27  | p=0.92 | p=0.36  | p=0.46  |
|                    | rural | 99.4 | 98.2 (113)     | 99.0<br>(107)  | 100.0<br>(85)  | 100.0<br>(67)  | 100.0<br>(28)  | 2.8  | 0.3  |         |         |        |         |         |
| Kyrgyzstan<br>2014 | urban | 99.6 | 100.0 (46)     | 100.0<br>(39)  | 100.0<br>(106) | 99.0<br>(193)  | 99.2<br>(237)  | -0.9 | -0.1 | p=0.25  | p=0.040 | p=0.23 | p=0.22  | p=0.999 |
|                    | rural | 98.1 | 96.2 (354)     | 98.8<br>(344)  | 98.6<br>(273)  | 98 (145)       | 98.9 (29)      | 2.7  | 0.5  |         |         |        |         |         |
| Lao<br>2011        | urban | 62.4 | 39.6 (35)      | 41.4 (87)      | 60.0<br>(137)  | 76.2<br>(240)  | 94.6<br>(391)  | 59.2 | 12.8 | p<0.001 | p<0.001 | p=0.13 | p<0.001 | p<0.001 |
|                    | rural | 42.8 | 9.9 (1332)     | 22.5<br>(923)  | 42.3<br>(711)  | 58 (428)       | 81.1<br>(160)  | 66.1 | 38.8 |         |         |        |         |         |
| Lesotho<br>2014    | urban | 82.3 | 100.0 (1)      | 55.6 (26)      | 66.5 (81)      | 95.0<br>(150)  | 94.6<br>(221)  | 30.9 | 5.2  | p=0.79  | p<0.001 | p=0.69 | p=0.10  | p<0.001 |
|                    | rural | 80.8 | 65.1 (519)     | 73.1<br>(397)  | 86.1<br>(352)  | 86 (207)       | 93.8 (78)      | 33.7 | 7.6  |         |         |        |         |         |
| Liberia<br>2013    | urban | 69.2 | 60.6 (155)     | 54.5<br>(225)  | 63.6<br>(443)  | 78.6<br>(394)  | 88.8<br>(242)  | 40.2 | 9.4  | p=0.56  | p=0.001 | p=0.48 | p=0.41  | p=0.23  |
|                    | rural | 65.5 | 44.1<br>(1484) | 56.9<br>(1017) | 64.1<br>(494)  | 75.6<br>(109)  | 86.9 (32)      | 33.9 | 11.3 |         |         |        |         |         |
| Macedonia<br>2011  | urban | 98.2 | 100.0 (15)     | 93.2 (33)      | 100.0<br>(56)  | 100.0<br>(73)  | 97.7 (87)      | 1.3  | 0.3  | p=0.85  | p=0.16  | p=0.62 | p=0.41  | p=0.245 |
|                    | rural | 99.0 | 97.2 (78)      | 97.7 (66)      | 100.0<br>(51)  | 100.0<br>(31)  | 100.0<br>(13)  | 4.3  | 0.5  |         |         |        |         |         |
| Malawi<br>2015     | urban | 89.5 | 77.2 (68)      | 86.8 (87)      | 92.7<br>(117)  | 94.7<br>(304)  | 96.2<br>(1055) | 8.3  | 1.6  | p=0.64  | p<0.001 | p=0.55 | p=0.43  | p=0.61  |
|                    | rural | 90.8 | 87.8<br>(2275) | 90.0<br>(2158) | 89.7<br>(1836) | 92.5<br>(1541) | 94.1<br>(741)  | 6.3  | 1.2  |         |         |        |         |         |

|                    |       |      |                |                |                |               |                |      |      |         |         |         |         |         |
|--------------------|-------|------|----------------|----------------|----------------|---------------|----------------|------|------|---------|---------|---------|---------|---------|
| Mali<br>2012       | urban | 61.5 | 0.0 (2)        | 61.4 (9)       | 59.2 (26)      | 90.7<br>(397) | 96.3<br>(1092) | 17.4 | 2.4  | p=0.85  | p<0.001 | p<0.001 | p<0.001 | p=0.632 |
|                    | rural | 60.1 | 37.9<br>(1148) | 47.2<br>(1190) | 52.5<br>(1168) | 73.9<br>(779) | 88.8<br>(205)  | 46.0 | 15.1 |         |         |         |         |         |
| Mauritania<br>2011 | urban | 76.4 | 56.7 (12)      | 62.7 (72)      | 76.2<br>(221)  | 90.6<br>(451) | 95.9<br>(606)  | 31.8 | 5.6  | p=0.022 | p<0.001 | p<0.001 | p<0.001 | p=0.003 |
|                    | rural | 64.4 | 26.2 (771)     | 43.8<br>(708)  | 69 (482)       | 86.2<br>(256) | 96.9 (50)      | 69.2 | 25.7 |         |         |         |         |         |
| Mexico<br>2015     | urban | 98.9 | 96.5 (227)     | 99.5<br>(473)  | 99.7<br>(416)  | 99.2<br>(352) | 99.8<br>(214)  | 2.4  | 0.4  | p=0.37  | p=0.023 | p<0.001 | p<0.001 | p=0.12  |
|                    | rural | 97.7 | 89.3 (580)     | 100 (215)      | 99.2<br>(103)  | 100.0<br>(49) | 100.0<br>(13)  | 34.0 | 4.8  |         |         |         |         |         |
| Moldova<br>2012    | urban | 99.7 | 100.0 (13)     | 100.0<br>(22)  | 100.0<br>(34)  | 99 (85)       | 99.6<br>(251)  | -0.1 | 0.0  | p=0.68  | p=0.15  | p=1.00  | p=0.85  | p=0.999 |
|                    | rural | 98.2 | 97.4 (71)      | 100.0<br>(95)  | 100.0<br>(810) | 100.0<br>(48) | 93.6 (23)      | 0.0  | 0.1  |         |         |         |         |         |
| Mongolia<br>2013   | urban | 99.0 | 100.0 (44)     | 99.5<br>(274)  | 98.7<br>(315)  | 98.3<br>(361) | 98.6<br>(427)  | -1.0 | -0.1 | p=0.78  | p<0.001 | p=0.036 | p=0.045 | p<0.001 |
|                    | rural | 98.7 | 97 (527)       | 99.3<br>(185)  | 97.4<br>(152)  | 100.0<br>(65) | 100.0<br>(22)  | 3.3  | 0.5  |         |         |         |         |         |
| Montenegro<br>2013 | urban | 99.2 | 100.0 (24)     | 100.0<br>(54)  | 98.0 (81)      | 97.9 (93)     | 100.0<br>(65)  | -0.4 | 0.0  | p=0.85  | p=0.24  | p=0.32  | p=0.13  | p=1.00  |
|                    | rural | 99.7 | 98.4 (56)      | 100.0<br>(49)  | 100.0<br>(20)  | 100.0<br>(12) | 100.0<br>(40)  | 2.3  | 0.5  |         |         |         |         |         |
| Mozambique<br>2011 | urban | 69.7 | 49.8 (126)     | 59.6<br>(1000) | 65.8<br>(208)  | 82.3<br>(527) | 90.9<br>(1293) | 42.4 | 8.7  | p=0.003 | p<0.001 | p=0.27  | p<0.001 | p=0.001 |
|                    | rural | 56.4 | 32.6<br>(1090) | 38.3<br>(1230) | 50.9<br>(1173) | 70.8<br>(984) | 89.5<br>(206)  | 48.9 | 18.1 |         |         |         |         |         |
| Myanmar<br>2015    | urban | 77.2 | 48.8 (36)      | 73.9 (46)      | 76.9 (83)      | 86.9<br>(197) | 99.7<br>(258)  | 47.1 | 8.0  | p=0.09  | p=0.07  | p=0.004 | p<0.001 | p=0.40  |

|               |       |      |             |             |             |             |             |      |      |         |         |         |         |         |
|---------------|-------|------|-------------|-------------|-------------|-------------|-------------|------|------|---------|---------|---------|---------|---------|
|               | rural | 67.2 | 39.1 (794)  | 54.2 (580)  | 68.8 (467)  | 79.5 (311)  | 94.6 (95)   | 56.3 | 17.9 |         |         |         |         |         |
| Namibia 2013  | urban | 92.0 | 77.3 (39)   | 96.9 (216)  | 91.1 (320)  | 96.4 (459)  | 98.4 (374)  | 7.8  | 1.5  | p=0.22  | p=0.68  | p=0.001 | p<0.001 | p<0.001 |
|               | rural | 88.0 | 75.7 (648)  | 85.1 (486)  | 87.7 (387)  | 92.8 (199)  | 98.7 (33)   | 23.3 | 5.1  |         |         |         |         |         |
| Nepal 2014    | urban | 78.6 | 58.5 (16)   | 80.0 (18)   | 69.9 (17)   | 84.7 (62)   | 99.8 (149)  | 44.7 | 6.8  | p<0.001 | p<0.001 | p=0.002 | p<0.001 | p<0.001 |
|               | rural | 55.8 | 24.3 (438)  | 43.5 (418)  | 55.1 (424)  | 68.6 (338)  | 87.6 (167)  | 62.6 | 22.4 |         |         |         |         |         |
| Niger 2012    | urban | 68.9 | 17.8 (5)    | 100 (2)     | 69.2 (16)   | 69.1 (204)  | 88.3 (1483) | 31.8 | 6.1  | p<0.001 | p=0.07  | p=0.32  | p<0.001 | p<0.001 |
|               | rural | 27.1 | 14 (1321)   | 22.1 (1321) | 23.9 (1387) | 28.5 (1304) | 47.2 (473)  | 25.7 | 18.5 |         |         |         |         |         |
| Nigeria 2013  | urban | 53.9 | 31.2 (223)  | 39.1 (444)  | 45.5 (1073) | 65.9 (1966) | 87.6 (2562) | 61.1 | 16.0 | p<0.001 | p<0.001 | p=0.32  | p<0.001 | p<0.001 |
|               | rural | 39.4 | 4.7 (3878)  | 16.4 (3979) | 38.2 (2700) | 60.0 (1537) | 77.9 (507)  | 65.7 | 47.9 |         |         |         |         |         |
| Pakistan 2012 | urban | 58.9 | 34.1 (153)  | 50.4 (307)  | 52.7 (546)  | 71.4 (766)  | 85.9 (1099) | 46.7 | 11.8 | p=0.92  | p=0.98  | p=0.69  | p=0.018 | p=0.32  |
|               | rural | 58.5 | 34 (1396)   | 42.9 (1073) | 56.2 (787)  | 74.3 (522)  | 85.2 (200)  | 49.8 | 17.7 |         |         |         |         |         |
| Panama 2013   | urban | 99.6 | 98.8 (86)   | 99.4 (148)  | 99.8 (221)  | 100 (214)   | 100.0 (96)  | 1.1  | 0.2  | p<0.001 | p<0.001 | p<0.001 | p<0.001 | p<0.001 |
|               | rural | 92.3 | 67.3 (1093) | 98.4 (270)  | 100.0 (79)  | 95.7 (39)   | 100.0 (32)  | 78.3 | 15.1 |         |         |         |         |         |
| Peru 2012     | urban | 92.2 | 73.5 (156)  | 90.9 (844)  | 97.5 (1084) | 99.5 (767)  | 99.5 (508)  | 16.4 | 2.5  | p=0.16  | p=0.006 | p<0.001 | p<0.001 | p=0.05  |
|               | rural | 87.6 | 63.4 (1448) | 85.9 (733)  | 97.4 (107)  | 91.2 (20)   | 100.0 (1)   | 51.0 | 13.3 |         |         |         |         |         |



|                          |       |       |                |               |                |               |               |      |      |        |         |         |         |         |
|--------------------------|-------|-------|----------------|---------------|----------------|---------------|---------------|------|------|--------|---------|---------|---------|---------|
| Philippines<br>2013      | urban | 80.4  | 49.4 (218)     | 73.9<br>(329) | 86.2<br>(421)  | 95.4<br>(448) | 97.3<br>(325) | 47.7 | 9.1  | p=0.57 | p=0.36  | p<0.001 | p<0.001 | p=0.88  |
|                          | rural | 78.7  | 45.7<br>(1123) | 74.4<br>(606) | 85 (414)       | 92.3<br>(223) | 96.3<br>(150) | 65.9 | 17.9 |        |         |         |         |         |
| Rwanda<br>2014           | urban | 94.8  | 88.1 (97)      | 94.3 (71)     | 98.3 (63)      | 95.2<br>(125) | 97.9<br>(739) | 7.1  | 1.2  | p=0.15 | p=0.33  | p=0.13  | p=0.029 | p=0.31  |
|                          | rural | 91.8  | 86 (1075)      | 90.9<br>(933) | 91.7<br>(818)  | 93.6<br>(712) | 96.8<br>(227) | 11.0 | 2.2  |        |         |         |         |         |
| Sao Tome &<br>P.<br>2014 | urban | 94.5  | 89.3 (108)     | 96.9 (79)     | 92.4 (93)      | 95.7 (86)     | 98.1 (86)     | 8.6  | 1.3  | p=0.29 | p=0.07  | p=0.09  | p=0.037 | p=0.31  |
|                          | rural | 89.5  | 79.5 (94)      | 87.6 (86)     | 92 (59)        | 97.1 (55)     | 91.3 (12)     | 21.8 | 4.1  |        |         |         |         |         |
| Senegal<br>2015          | urban | 65.1  | 53.2 (80)      | 62.3<br>(136) | 65.3<br>(229)  | 64.6<br>(375) | 79.9<br>(241) | 24.6 | 6.6  | p=0.11 | p<0.001 | p=0.009 | p<0.001 | p=0.03  |
|                          | rural | 54.9  | 29.9<br>(1294) | 44.7<br>(976) | 55.6<br>(571)  | 69.2<br>(196) | 75 (66)       | 45.9 | 17.6 |        |         |         |         |         |
| Serbia<br>2014           | urban | 98.9  | 100.0 (16)     | 100.0<br>(20) | 100.0<br>(43)  | 99.8 (64)     | 94.5 (84)     | -9.9 | -2.0 | p=0.89 | p=0.023 | p=0.13  | p=0.09  | p=0.999 |
|                          | rural | 99.3  | 96.4 (35)      | 100.0<br>(42) | 100.0<br>(39)  | 100.0<br>(20) | 100.0<br>(17) | 4.3  | 0.7  |        |         |         |         |         |
| Sierra Leone<br>2013     | urban | 68.3  | 48.3 (84)      | 56.5 (62)     | 71.9<br>(201)  | 78.6<br>(817) | 86.1<br>(972) | 26.2 | 5.8  | p=0.23 | p=0.27  | p=0.11  | p=0.37  | p=0.22  |
|                          | rural | 59.3  | 53.5<br>(1557) | 55 (1354)     | 55.8<br>(1255) | 65.2<br>(728) | 66.9 (65)     | 11.5 | 3.7  |        |         |         |         |         |
| South Sudan<br>2010      | urban | 23.6  | 14.7 (98)      | 12.0 (89)     | 18.5<br>(173)  | 26.9<br>(238) | 46.0<br>(398) | 46.8 | 26.6 | p=0.06 | p=0.33  | p=0.009 | p=0.15  | p=0.65  |
|                          | rural | 17.2  | 7.3 (529)      | 9.0 (586)     | 12.2<br>(532)  | 21.6<br>(521) | 35.7<br>(352) | 29.9 | 33.5 |        |         |         |         |         |
| Saint Lucia<br>2012      | urban | 100.0 | 100.0 (9)      | 100.0<br>(11) | 100.0 (7)      | 100.0 (2)     | 100.0 (4)     | 0.0  | 2.9  | p=0.83 | p=0.27  | p=0.37  | p=0.06  | p=0.999 |
|                          | rural | 98.4  | 91.8 (12)      | 100.0<br>(15) | 100.0<br>(15)  | 100.0<br>(15) | 100.0 (8)     | 9.5  | 1.0  |        |         |         |         |         |

|                            |       |      |             |             |             |            |             |      |      |        |         |         |         |         |
|----------------------------|-------|------|-------------|-------------|-------------|------------|-------------|------|------|--------|---------|---------|---------|---------|
| State of Palestine<br>2014 | urban | 99.6 | 99.7 (656)  | 99.2 (477)  | 99.6 (453)  | 100 (468)  | 99.3 (381)  | -0.1 | 0.0  | p=0.73 | p=0.16  | p=0.92  | p=0.43  | p=0.32  |
|                            | rural | 99.8 | 100.0 (15)  | 100.0 (50)  | 99.4 (160)  | 99.4 (151) | 100.0 (80)  | 0.0  | -0.1 |        |         |         |         |         |
| Sudan<br>2014              | urban | 82.9 | 50.6 (47)   | 81.9 (170)  | 91 (414)    | 94 (434)   | 96.9 (438)  | 21.3 | 3.6  | p=0.13 | p=0.52  | p<0.001 | p<0.001 | p=0.03  |
|                            | rural | 77.4 | 47.6 (1197) | 68.6 (1364) | 80.7 (878)  | 95 (478)   | 95.2 (265)  | 60.0 | 14.9 |        |         |         |         |         |
| Suriname<br>2010           | urban | 96.5 | 96.2 (86)   | 93.3 (149)  | 98 (164)    | 98.8 (143) | 96 (126)    | 3.2  | 0.4  | p=0.43 | p<0.001 | p<0.001 | p<0.001 | p<0.001 |
|                            | rural | 94.3 | 80.2 (254)  | 94.9 (62)   | 98.4 (36)   | 97.8 (24)  | 100.0 (15)  | 44.3 | 7.1  |        |         |         |         |         |
| Swaziland<br>2014          | urban | 89.9 | 76.1 (6)    | 96.2 (20)   | 86 (31)     | 97.4 (48)  | 93.6 (86)   | 5.1  | 1.1  | p=0.88 | p=0.96  | p<0.001 | p=0.002 | p=0.031 |
|                            | rural | 89.1 | 76.4 (244)  | 85.9 (219)  | 91.3 (189)  | 93.2 (97)  | 98.8 (47)   | 25.9 | 5.2  |        |         |         |         |         |
| Tajikistan<br>2012         | urban | 93.2 | 90.9 (21)   | 96.4 (50)   | 91.1 (90)   | 91.5 (184) | 96.3 (621)  | 6.4  | 1.1  | p=0.19 | p<0.001 | p<0.001 | p<0.001 | p<0.001 |
|                            | rural | 89.0 | 73.4 (531)  | 86.3 (563)  | 91.7 (549)  | 95.5 (445) | 98.3 (141)  | 30.0 | 5.6  |        |         |         |         |         |
| Tanzania<br>2015           | urban | 74.4 | 50.7 (79)   | 68.0 (43)   | 72.3 (96)   | 84.5 (487) | 91.3 (548)  | 40.9 | 7.3  | p=0.11 | p=0.06  | p=0.92  | p=0.016 | p=0.86  |
|                            | rural | 65.4 | 43.0 (1349) | 52.3 (1240) | 61.2 (1115) | 77.2 (843) | 77.2 (204)  | 41.5 | 13.0 |        |         |         |         |         |
| Thailand<br>2012           | urban | 99.1 | 96.2 (125)  | 100.0 (190) | 100.0 (311) | 99.6 (384) | 99.9 (464)  | 1.6  | 0.3  | p=0.55 | p=0.06  | p=0.62  | p=0.65  | p=0.31  |
|                            | rural | 99.7 | 99.1 (215)  | 99.5 (277)  | 100.0 (333) | 99.7 (303) | 100.0 (160) | 0.9  | 0.2  |        |         |         |         |         |
| Togo<br>2013               | urban | 72.1 | 45.6 (7)    | 58.0 (10)   | 68.2 (62)   | 92.5 (519) | 96.1 (631)  | 18.7 | 3.3  | p=0.17 | p<0.001 | p<0.001 | p<0.001 | p=0.01  |

|                 |       |      |                |                |                |                |                |      |      |         |         |         |         |         |
|-----------------|-------|------|----------------|----------------|----------------|----------------|----------------|------|------|---------|---------|---------|---------|---------|
|                 | rural | 60.6 | 27.7<br>(1233) | 38.7<br>(857)  | 57.7<br>(767)  | 79.1<br>(150)  | 100.0<br>(10)  | 51.4 | 19.9 |         |         |         |         |         |
| Tunisia<br>2011 | urban | 99.3 | 97.3 (49)      | 100 (112)      | 100 (139)      | 99.8<br>(203)  | 99.6<br>(143)  | 0.5  | 0.1  | p=0.56  | p=0.11  | p<0.001 | p<0.001 | p=0.27  |
|                 | rural | 98.5 | 93 (253)       | 99.6<br>(138)  | 100 (57)       | 100 (31)       | 100 (10)       | 15.7 | 2.4  |         |         |         |         |         |
| Uganda<br>2011  | urban | 82.3 | 85.5 (16)      | 69.5 (26)      | 80.9 (37)      | 83 (86)        | 92.4<br>(530)  | 19.9 | 2.6  | p<0.001 | p<0.001 | p=0.006 | p<0.001 | p<0.001 |
|                 | rural | 58.8 | 43.9<br>(1089) | 50.9<br>(1013) | 55.4<br>(949)  | 59 (798)       | 84.6<br>(360)  | 31.8 | 10.2 |         |         |         |         |         |
| Vietnam<br>2013 | urban | 96.6 | 84.1 (20)      | 100.0<br>(37)  | 100.0<br>(62)  | 98.9<br>(106)  | 100.0<br>(203) | 5.2  | 0.7  | p=0.41  | p=0.08  | p<0.001 | p<0.001 | p=0.06  |
|                 | rural | 93.5 | 72.6 (274)     | 96.4<br>(251)  | 99.6<br>(230)  | 99.1<br>(208)  | 100.0<br>(73)  | 42.4 | 6.9  |         |         |         |         |         |
| Yemen<br>2013   | urban | 67.0 | 57.3 (16)      | 65.6 (74)      | 60.2<br>(212)  | 68.3<br>(881)  | 83.7<br>(1017) | 31.6 | 7.3  | p=0.002 | p<0.001 | p=0.003 | p<0.001 | p<0.001 |
|                 | rural | 46.5 | 20.1<br>(2124) | 31.5<br>(2156) | 44.3<br>(1893) | 59.6<br>(1043) | 76.8<br>(378)  | 48.3 | 23.5 |         |         |         |         |         |
| Zambia<br>2013  | urban | 81.2 | 67 (23)        | 69.4<br>(111)  | 82.6<br>(438)  | 91.2<br>(1041) | 95.9<br>(1084) | 21.9 | 3.9  | p<0.001 | p<0.001 | p=0.92  | p=0.006 | p=0.12  |
|                 | rural | 62.7 | 48.6<br>(1870) | 54.7<br>(1740) | 58.5<br>(1180) | 74.4<br>(345)  | 77.5 (74)      | 22.2 | 7.0  |         |         |         |         |         |

Values in red show cells with a denominator below 25 observations.
