# Supplementary material for: Socioeconomic inequalities in access to skilled birth attendance among urban and rural women in low-income and middle-income countries
Source: BMJ Glob Health. 2018 Dec 1;3(6):e000898. doi: 10.1136/bmjgh-2018-000898 (PMC6278921; doi:10.1136/bmjgh-2018-000898)
Supplement: Supplementary data [file bmjgh-2018-000898supp003.xlsx]

## Sheet: Plan
country	year	source	wiqarea	sba_r
Afghanistan	2015	DHS	Q1 - 1 urban	47.5038
Afghanistan	2015	DHS	Q1 - 2 rural	25.9655
Afghanistan	2015	DHS	Q2 - 1 urban	69.0573
Afghanistan	2015	DHS	Q2 - 2 rural	38.9033
Afghanistan	2015	DHS	Q3 - 1 urban	72.4625
Afghanistan	2015	DHS	Q3 - 2 rural	46.1517
Afghanistan	2015	DHS	Q4 - 1 urban	67.7581
Afghanistan	2015	DHS	Q4 - 2 rural	68.8055
Afghanistan	2015	DHS	Q5 - 1 urban	87.7768
Afghanistan	2015	DHS	Q5 - 2 rural	89.6892
Algeria	2012	MICS	Q1 - 1 urban	97.5048
Algeria	2012	MICS	Q1 - 2 rural	93.4506
Algeria	2012	MICS	Q2 - 1 urban	96.9361
Algeria	2012	MICS	Q2 - 2 rural	96.2946
Algeria	2012	MICS	Q3 - 1 urban	97.6998
Algeria	2012	MICS	Q3 - 2 rural	93.9942
Algeria	2012	MICS	Q4 - 1 urban	97.8137
Algeria	2012	MICS	Q4 - 2 rural	95.3804
Algeria	2012	MICS	Q5 - 1 urban	98.5628
Algeria	2012	MICS	Q5 - 2 rural	100
Armenia	2010	DHS	Q1 - 1 urban	100
Armenia	2010	DHS	Q1 - 2 rural	100
Armenia	2010	DHS	Q2 - 1 urban	99.7022
Armenia	2010	DHS	Q2 - 2 rural	100
Armenia	2010	DHS	Q3 - 1 urban	100
Armenia	2010	DHS	Q3 - 2 rural	100
Armenia	2010	DHS	Q4 - 1 urban	99.0544
Armenia	2010	DHS	Q4 - 2 rural	100
Armenia	2010	DHS	Q5 - 1 urban	100
Armenia	2010	DHS	Q5 - 2 rural	100
Bangladesh	2014	DHS	Q1 - 1 urban	18.4049
Bangladesh	2014	DHS	Q1 - 2 rural	17.8686
Bangladesh	2014	DHS	Q2 - 1 urban	41.6082
Bangladesh	2014	DHS	Q2 - 2 rural	28.8609
Bangladesh	2014	DHS	Q3 - 1 urban	47.0705
Bangladesh	2014	DHS	Q3 - 2 rural	37.2915
Bangladesh	2014	DHS	Q4 - 1 urban	51.8009
Bangladesh	2014	DHS	Q4 - 2 rural	52.0435
Bangladesh	2014	DHS	Q5 - 1 urban	76.7548
Bangladesh	2014	DHS	Q5 - 2 rural	70.0214
Barbados	2012	MICS	Q1 - 1 urban	100
Barbados	2012	MICS	Q1 - 2 rural	100
Barbados	2012	MICS	Q2 - 1 urban	92.3195
Barbados	2012	MICS	Q2 - 2 rural	100
Barbados	2012	MICS	Q3 - 1 urban	100
Barbados	2012	MICS	Q3 - 2 rural	100
Barbados	2012	MICS	Q4 - 1 urban	100
Barbados	2012	MICS	Q4 - 2 rural	100
Barbados	2012	MICS	Q5 - 1 urban	100
Barbados	2012	MICS	Q5 - 2 rural	100
Belarus	2012	MICS	Q1 - 1 urban	100
Belarus	2012	MICS	Q1 - 2 rural	100
Belarus	2012	MICS	Q2 - 1 urban	100
Belarus	2012	MICS	Q2 - 2 rural	100
Belarus	2012	MICS	Q3 - 1 urban	99.7198
Belarus	2012	MICS	Q3 - 2 rural	100
Belarus	2012	MICS	Q4 - 1 urban	100
Belarus	2012	MICS	Q4 - 2 rural	100
Belarus	2012	MICS	Q5 - 1 urban	100
Belarus	2012	MICS	Q5 - 2 rural	100
Belize	2011	MICS	Q1 - 1 urban	100
Belize	2011	MICS	Q1 - 2 rural	87.5408
Belize	2011	MICS	Q2 - 1 urban	98.1767
Belize	2011	MICS	Q2 - 2 rural	98.6255
Belize	2011	MICS	Q3 - 1 urban	97.3157
Belize	2011	MICS	Q3 - 2 rural	97.8993
Belize	2011	MICS	Q4 - 1 urban	99.0476
Belize	2011	MICS	Q4 - 2 rural	100
Belize	2011	MICS	Q5 - 1 urban	98.4731
Belize	2011	MICS	Q5 - 2 rural	97.33
Benin	2011	DHS	Q1 - 1 urban	64.4753
Benin	2011	DHS	Q1 - 2 rural	66.0349
Benin	2011	DHS	Q2 - 1 urban	80.5555
Benin	2011	DHS	Q2 - 2 rural	79.3033
Benin	2011	DHS	Q3 - 1 urban	87.461
Benin	2011	DHS	Q3 - 2 rural	85.1273
Benin	2011	DHS	Q4 - 1 urban	97.2771
Benin	2011	DHS	Q4 - 2 rural	95.8152
Benin	2011	DHS	Q5 - 1 urban	98.7762
Benin	2011	DHS	Q5 - 2 rural	99.0093
Bhutan	2010	MICS	Q1 - 1 urban	100
Bhutan	2010	MICS	Q1 - 2 rural	34.0743
Bhutan	2010	MICS	Q2 - 1 urban	31.1163
Bhutan	2010	MICS	Q2 - 2 rural	43.1607
Bhutan	2010	MICS	Q3 - 1 urban	85.7787
Bhutan	2010	MICS	Q3 - 2 rural	63.1469
Bhutan	2010	MICS	Q4 - 1 urban	84.3405
Bhutan	2010	MICS	Q4 - 2 rural	76.8234
Bhutan	2010	MICS	Q5 - 1 urban	94.9368
Bhutan	2010	MICS	Q5 - 2 rural	95.6612
Bosnia and Herzegovina	2011	MICS	Q1 - 1 urban	100
Bosnia and Herzegovina	2011	MICS	Q1 - 2 rural	100
Bosnia and Herzegovina	2011	MICS	Q2 - 1 urban	100
Bosnia and Herzegovina	2011	MICS	Q2 - 2 rural	99.5574
Bosnia and Herzegovina	2011	MICS	Q3 - 1 urban	100
Bosnia and Herzegovina	2011	MICS	Q3 - 2 rural	100
Bosnia and Herzegovina	2011	MICS	Q4 - 1 urban	100
Bosnia and Herzegovina	2011	MICS	Q4 - 2 rural	100
Bosnia and Herzegovina	2011	MICS	Q5 - 1 urban	100
Bosnia and Herzegovina	2011	MICS	Q5 - 2 rural	100
Burkina Faso	2010	DHS	Q1 - 1 urban	72.6832
Burkina Faso	2010	DHS	Q1 - 2 rural	50.4004
Burkina Faso	2010	DHS	Q2 - 1 urban	85.6634
Burkina Faso	2010	DHS	Q2 - 2 rural	63.526
Burkina Faso	2010	DHS	Q3 - 1 urban	88.7025
Burkina Faso	2010	DHS	Q3 - 2 rural	73.0191
Burkina Faso	2010	DHS	Q4 - 1 urban	95.9614
Burkina Faso	2010	DHS	Q4 - 2 rural	80.5235
Burkina Faso	2010	DHS	Q5 - 1 urban	97.2417
Burkina Faso	2010	DHS	Q5 - 2 rural	90.7037
Burundi	2010	DHS	Q1 - 1 urban	76.3786
Burundi	2010	DHS	Q1 - 2 rural	54.8647
Burundi	2010	DHS	Q2 - 1 urban	84.8495
Burundi	2010	DHS	Q2 - 2 rural	58.5421
Burundi	2010	DHS	Q3 - 1 urban	79.6313
Burundi	2010	DHS	Q3 - 2 rural	64.1125
Burundi	2010	DHS	Q4 - 1 urban	78.6489
Burundi	2010	DHS	Q4 - 2 rural	65.9596
Burundi	2010	DHS	Q5 - 1 urban	93.5795
Burundi	2010	DHS	Q5 - 2 rural	76.7408
Cambodia	2014	DHS	Q1 - 1 urban	82.2186
Cambodia	2014	DHS	Q1 - 2 rural	78.9718
Cambodia	2014	DHS	Q2 - 1 urban	95.1384
Cambodia	2014	DHS	Q2 - 2 rural	90.8488
Cambodia	2014	DHS	Q3 - 1 urban	98.3699
Cambodia	2014	DHS	Q3 - 2 rural	95.2419
Cambodia	2014	DHS	Q4 - 1 urban	97.5066
Cambodia	2014	DHS	Q4 - 2 rural	97.963
Cambodia	2014	DHS	Q5 - 1 urban	99.1482
Cambodia	2014	DHS	Q5 - 2 rural	98.0744
Cameroon	2011	DHS	Q1 - 1 urban
Cameroon	2011	DHS	Q1 - 2 rural	18.7891
Cameroon	2011	DHS	Q2 - 1 urban	56.9746
Cameroon	2011	DHS	Q2 - 2 rural	55.8699
Cameroon	2011	DHS	Q3 - 1 urban	73.988
Cameroon	2011	DHS	Q3 - 2 rural	80.8516
Cameroon	2011	DHS	Q4 - 1 urban	91.1218
Cameroon	2011	DHS	Q4 - 2 rural	88.1463
Cameroon	2011	DHS	Q5 - 1 urban	97.4345
Cameroon	2011	DHS	Q5 - 2 rural	98.5752
CAR	2010	MICS	Q1 - 1 urban	63.8975
CAR	2010	MICS	Q1 - 2 rural	29.8596
CAR	2010	MICS	Q2 - 1 urban	63.3568
CAR	2010	MICS	Q2 - 2 rural	36.2201
CAR	2010	MICS	Q3 - 1 urban	66.6788
CAR	2010	MICS	Q3 - 2 rural	45.3629
CAR	2010	MICS	Q4 - 1 urban	84.018
CAR	2010	MICS	Q4 - 2 rural	46.5138
CAR	2010	MICS	Q5 - 1 urban	93.1391
CAR	2010	MICS	Q5 - 2 rural	49.0296
Chad	2014	DHS	Q1 - 1 urban	15.3768
Chad	2014	DHS	Q1 - 2 rural	14.5558
Chad	2014	DHS	Q2 - 1 urban	41.371
Chad	2014	DHS	Q2 - 2 rural	18.4615
Chad	2014	DHS	Q3 - 1 urban	18.7097
Chad	2014	DHS	Q3 - 2 rural	18.2454
Chad	2014	DHS	Q4 - 1 urban	38.1835
Chad	2014	DHS	Q4 - 2 rural	17.5631
Chad	2014	DHS	Q5 - 1 urban	69.946
Chad	2014	DHS	Q5 - 2 rural	26.6324
Colombia	2015	DHS	Q1 - 1 urban	97.8454
Colombia	2015	DHS	Q1 - 2 rural	86.5301
Colombia	2015	DHS	Q2 - 1 urban	99.303
Colombia	2015	DHS	Q2 - 2 rural	99.4634
Colombia	2015	DHS	Q3 - 1 urban	99.2434
Colombia	2015	DHS	Q3 - 2 rural	100
Colombia	2015	DHS	Q4 - 1 urban	99.2167
Colombia	2015	DHS	Q4 - 2 rural	100
Colombia	2015	DHS	Q5 - 1 urban	98.9871
Colombia	2015	DHS	Q5 - 2 rural	100
Comoros	2012	DHS	Q1 - 1 urban	82.2082
Comoros	2012	DHS	Q1 - 2 rural	63.8956
Comoros	2012	DHS	Q2 - 1 urban	86.4184
Comoros	2012	DHS	Q2 - 2 rural	78.6128
Comoros	2012	DHS	Q3 - 1 urban	94.4439
Comoros	2012	DHS	Q3 - 2 rural	89.6224
Comoros	2012	DHS	Q4 - 1 urban	99.1318
Comoros	2012	DHS	Q4 - 2 rural	91.722
Comoros	2012	DHS	Q5 - 1 urban	98.3922
Comoros	2012	DHS	Q5 - 2 rural	91.7678
Congo	2011	DHS	Q1 - 1 urban
Congo	2011	DHS	Q1 - 2 rural	81.3918
Congo	2011	DHS	Q2 - 1 urban	97.848
Congo	2011	DHS	Q2 - 2 rural	93.0407
Congo	2011	DHS	Q3 - 1 urban	97.9985
Congo	2011	DHS	Q3 - 2 rural	98.946
Congo	2011	DHS	Q4 - 1 urban	98.9532
Congo	2011	DHS	Q4 - 2 rural	99.4909
Congo	2011	DHS	Q5 - 1 urban	99.1862
Congo	2011	DHS	Q5 - 2 rural	100
Congo Democratic Republic	2013	DHS	Q1 - 1 urban	81.5738
Congo Democratic Republic	2013	DHS	Q1 - 2 rural	65.4864
Congo Democratic Republic	2013	DHS	Q2 - 1 urban	84.7422
Congo Democratic Republic	2013	DHS	Q2 - 2 rural	71.9406
Congo Democratic Republic	2013	DHS	Q3 - 1 urban	88.8922
Congo Democratic Republic	2013	DHS	Q3 - 2 rural	78.0142
Congo Democratic Republic	2013	DHS	Q4 - 1 urban	92.7617
Congo Democratic Republic	2013	DHS	Q4 - 2 rural	91.5502
Congo Democratic Republic	2013	DHS	Q5 - 1 urban	97.838
Congo Democratic Republic	2013	DHS	Q5 - 2 rural	94.8254
Costa Rica	2011	MICS	Q1 - 1 urban	99.665
Costa Rica	2011	MICS	Q1 - 2 rural	95.2035
Costa Rica	2011	MICS	Q2 - 1 urban	99.5452
Costa Rica	2011	MICS	Q2 - 2 rural	98.5551
Costa Rica	2011	MICS	Q3 - 1 urban	99.5292
Costa Rica	2011	MICS	Q3 - 2 rural	100
Costa Rica	2011	MICS	Q4 - 1 urban	97.0949
Costa Rica	2011	MICS	Q4 - 2 rural	100
Costa Rica	2011	MICS	Q5 - 1 urban	100
Costa Rica	2011	MICS	Q5 - 2 rural	95.232
Côte d'Ivoire	2011	DHS	Q1 - 1 urban
Côte d'Ivoire	2011	DHS	Q1 - 2 rural	36.9872
Côte d'Ivoire	2011	DHS	Q2 - 1 urban	76.9107
Côte d'Ivoire	2011	DHS	Q2 - 2 rural	53.0027
Côte d'Ivoire	2011	DHS	Q3 - 1 urban	72.3057
Côte d'Ivoire	2011	DHS	Q3 - 2 rural	43.2926
Côte d'Ivoire	2011	DHS	Q4 - 1 urban	84.7519
Côte d'Ivoire	2011	DHS	Q4 - 2 rural	66.3802
Côte d'Ivoire	2011	DHS	Q5 - 1 urban	91.901
Côte d'Ivoire	2011	DHS	Q5 - 2 rural	86.1369
Dominican Republic	2014	MICS	Q1 - 1 urban	97.9579
Dominican Republic	2014	MICS	Q1 - 2 rural	97.843
Dominican Republic	2014	MICS	Q2 - 1 urban	99.3614
Dominican Republic	2014	MICS	Q2 - 2 rural	98.1372
Dominican Republic	2014	MICS	Q3 - 1 urban	99.4556
Dominican Republic	2014	MICS	Q3 - 2 rural	99.3612
Dominican Republic	2014	MICS	Q4 - 1 urban	98.2701
Dominican Republic	2014	MICS	Q4 - 2 rural	99.0939
Dominican Republic	2014	MICS	Q5 - 1 urban	98.8901
Dominican Republic	2014	MICS	Q5 - 2 rural	99.4023
Egypt	2014	DHS	Q1 - 1 urban	87.4377
Egypt	2014	DHS	Q1 - 2 rural	84.8486
Egypt	2014	DHS	Q2 - 1 urban	89.9928
Egypt	2014	DHS	Q2 - 2 rural	86.9788
Egypt	2014	DHS	Q3 - 1 urban	89.5061
Egypt	2014	DHS	Q3 - 2 rural	94.9564
Egypt	2014	DHS	Q4 - 1 urban	96.0743
Egypt	2014	DHS	Q4 - 2 rural	98.4537
Egypt	2014	DHS	Q5 - 1 urban	98.9198
Egypt	2014	DHS	Q5 - 2 rural
El Salvador	2014	MICS	Q1 - 1 urban	97.5707
El Salvador	2014	MICS	Q1 - 2 rural	92.3922
El Salvador	2014	MICS	Q2 - 1 urban	98.566
El Salvador	2014	MICS	Q2 - 2 rural	97.6422
El Salvador	2014	MICS	Q3 - 1 urban	99.5518
El Salvador	2014	MICS	Q3 - 2 rural	98.7124
El Salvador	2014	MICS	Q4 - 1 urban	99.5008
El Salvador	2014	MICS	Q4 - 2 rural	99.0952
El Salvador	2014	MICS	Q5 - 1 urban	99.4675
El Salvador	2014	MICS	Q5 - 2 rural	100
Ethiopia	2011	DHS	Q1 - 1 urban	11.3814
Ethiopia	2011	DHS	Q1 - 2 rural	2.73465
Ethiopia	2011	DHS	Q2 - 1 urban	11.26
Ethiopia	2011	DHS	Q2 - 2 rural	3.75353
Ethiopia	2011	DHS	Q3 - 1 urban	2.5246
Ethiopia	2011	DHS	Q3 - 2 rural	4.10896
Ethiopia	2011	DHS	Q4 - 1 urban	27.1688
Ethiopia	2011	DHS	Q4 - 2 rural	7.80467
Ethiopia	2011	DHS	Q5 - 1 urban	61.8432
Ethiopia	2011	DHS	Q5 - 2 rural	18.6712
Gabon	2012	DHS	Q1 - 1 urban	87.2308
Gabon	2012	DHS	Q1 - 2 rural	66.0413
Gabon	2012	DHS	Q2 - 1 urban	94.1409
Gabon	2012	DHS	Q2 - 2 rural	78.2282
Gabon	2012	DHS	Q3 - 1 urban	95.9341
Gabon	2012	DHS	Q3 - 2 rural	77.6367
Gabon	2012	DHS	Q4 - 1 urban	95.0812
Gabon	2012	DHS	Q4 - 2 rural	97.6016
Gabon	2012	DHS	Q5 - 1 urban	95.5434
Gabon	2012	DHS	Q5 - 2 rural	100
Gambia	2013	DHS	Q1 - 1 urban	72.5841
Gambia	2013	DHS	Q1 - 2 rural	44.8608
Gambia	2013	DHS	Q2 - 1 urban	74.1535
Gambia	2013	DHS	Q2 - 2 rural	42.7375
Gambia	2013	DHS	Q3 - 1 urban	66.7459
Gambia	2013	DHS	Q3 - 2 rural	38.9059
Gambia	2013	DHS	Q4 - 1 urban	73.3953
Gambia	2013	DHS	Q4 - 2 rural	33.3595
Gambia	2013	DHS	Q5 - 1 urban	82.074
Gambia	2013	DHS	Q5 - 2 rural	58.4549
Ghana	2014	DHS	Q1 - 1 urban	69.4283
Ghana	2014	DHS	Q1 - 2 rural	48.4691
Ghana	2014	DHS	Q2 - 1 urban	73.092
Ghana	2014	DHS	Q2 - 2 rural	61.8039
Ghana	2014	DHS	Q3 - 1 urban	86.2444
Ghana	2014	DHS	Q3 - 2 rural	71.5927
Ghana	2014	DHS	Q4 - 1 urban	94.5268
Ghana	2014	DHS	Q4 - 2 rural	96.458
Ghana	2014	DHS	Q5 - 1 urban	97.5732
Ghana	2014	DHS	Q5 - 2 rural	100
Guatemala	2014	DHS	Q1 - 1 urban	49.2394
Guatemala	2014	DHS	Q1 - 2 rural	38.687
Guatemala	2014	DHS	Q2 - 1 urban	67.433
Guatemala	2014	DHS	Q2 - 2 rural	54.6176
Guatemala	2014	DHS	Q3 - 1 urban	81.9895
Guatemala	2014	DHS	Q3 - 2 rural	76.8791
Guatemala	2014	DHS	Q4 - 1 urban	92.8767
Guatemala	2014	DHS	Q4 - 2 rural	90.8795
Guatemala	2014	DHS	Q5 - 1 urban	97.5558
Guatemala	2014	DHS	Q5 - 2 rural	90.5014
Guinea	2012	DHS	Q1 - 1 urban	52.2069
Guinea	2012	DHS	Q1 - 2 rural	19.5363
Guinea	2012	DHS	Q2 - 1 urban	28.1859
Guinea	2012	DHS	Q2 - 2 rural	28.1663
Guinea	2012	DHS	Q3 - 1 urban	68.7189
Guinea	2012	DHS	Q3 - 2 rural	38.4867
Guinea	2012	DHS	Q4 - 1 urban	78.6073
Guinea	2012	DHS	Q4 - 2 rural	54.8683
Guinea	2012	DHS	Q5 - 1 urban	91.5967
Guinea	2012	DHS	Q5 - 2 rural	100
Guinea-Bissau	2014	MICS	Q1 - 1 urban	45.5855
Guinea-Bissau	2014	MICS	Q1 - 2 rural	25.3154
Guinea-Bissau	2014	MICS	Q2 - 1 urban	58.2133
Guinea-Bissau	2014	MICS	Q2 - 2 rural	27.032
Guinea-Bissau	2014	MICS	Q3 - 1 urban	47.8089
Guinea-Bissau	2014	MICS	Q3 - 2 rural	30.2756
Guinea-Bissau	2014	MICS	Q4 - 1 urban	74.6422
Guinea-Bissau	2014	MICS	Q4 - 2 rural	49.6186
Guinea-Bissau	2014	MICS	Q5 - 1 urban	83.3129
Guinea-Bissau	2014	MICS	Q5 - 2 rural	69.8534
Guyana	2014	MICS	Q1 - 1 urban	98.5064
Guyana	2014	MICS	Q1 - 2 rural	76.2538
Guyana	2014	MICS	Q2 - 1 urban	100
Guyana	2014	MICS	Q2 - 2 rural	94.645
Guyana	2014	MICS	Q3 - 1 urban	100
Guyana	2014	MICS	Q3 - 2 rural	96.4271
Guyana	2014	MICS	Q4 - 1 urban	100
Guyana	2014	MICS	Q4 - 2 rural	100
Guyana	2014	MICS	Q5 - 1 urban	100
Guyana	2014	MICS	Q5 - 2 rural	100
Haiti	2012	DHS	Q1 - 1 urban
Haiti	2012	DHS	Q1 - 2 rural	10.8733
Haiti	2012	DHS	Q2 - 1 urban	43.1161
Haiti	2012	DHS	Q2 - 2 rural	21.5388
Haiti	2012	DHS	Q3 - 1 urban	43.9963
Haiti	2012	DHS	Q3 - 2 rural	42.6416
Haiti	2012	DHS	Q4 - 1 urban	56.2771
Haiti	2012	DHS	Q4 - 2 rural	50.4633
Haiti	2012	DHS	Q5 - 1 urban	84.2044
Haiti	2012	DHS	Q5 - 2 rural	75.1346
Honduras	2011	DHS	Q1 - 1 urban	79.853
Honduras	2011	DHS	Q1 - 2 rural	59.5081
Honduras	2011	DHS	Q2 - 1 urban	88.7762
Honduras	2011	DHS	Q2 - 2 rural	81.656
Honduras	2011	DHS	Q3 - 1 urban	93.5579
Honduras	2011	DHS	Q3 - 2 rural	89.5448
Honduras	2011	DHS	Q4 - 1 urban	97.424
Honduras	2011	DHS	Q4 - 2 rural	95.599
Honduras	2011	DHS	Q5 - 1 urban	98.2479
Honduras	2011	DHS	Q5 - 2 rural	98.622
Indonesia	2012	DHS	Q1 - 1 urban	75.2618
Indonesia	2012	DHS	Q1 - 2 rural	57.794
Indonesia	2012	DHS	Q2 - 1 urban	90.0862
Indonesia	2012	DHS	Q2 - 2 rural	81.0993
Indonesia	2012	DHS	Q3 - 1 urban	92.4546
Indonesia	2012	DHS	Q3 - 2 rural	89.0638
Indonesia	2012	DHS	Q4 - 1 urban	95.3374
Indonesia	2012	DHS	Q4 - 2 rural	95.2014
Indonesia	2012	DHS	Q5 - 1 urban	97.3461
Indonesia	2012	DHS	Q5 - 2 rural	97.7613
Iraq	2011	MICS	Q1 - 1 urban	85.4142
Iraq	2011	MICS	Q1 - 2 rural	80.5974
Iraq	2011	MICS	Q2 - 1 urban	91.2365
Iraq	2011	MICS	Q2 - 2 rural	86.9726
Iraq	2011	MICS	Q3 - 1 urban	95.7257
Iraq	2011	MICS	Q3 - 2 rural	87.4182
Iraq	2011	MICS	Q4 - 1 urban	96.2337
Iraq	2011	MICS	Q4 - 2 rural	90.7179
Iraq	2011	MICS	Q5 - 1 urban	95.9998
Iraq	2011	MICS	Q5 - 2 rural	95.2303
Jamaica	2011	MICS	Q1 - 1 urban	100
Jamaica	2011	MICS	Q1 - 2 rural	94.8924
Jamaica	2011	MICS	Q2 - 1 urban	99.2332
Jamaica	2011	MICS	Q2 - 2 rural	100
Jamaica	2011	MICS	Q3 - 1 urban	100
Jamaica	2011	MICS	Q3 - 2 rural	100
Jamaica	2011	MICS	Q4 - 1 urban	100
Jamaica	2011	MICS	Q4 - 2 rural	100
Jamaica	2011	MICS	Q5 - 1 urban	100
Jamaica	2011	MICS	Q5 - 2 rural	100
Jordan	2012	DHS	Q1 - 1 urban	98.4476
Jordan	2012	DHS	Q1 - 2 rural	99.423
Jordan	2012	DHS	Q2 - 1 urban	100
Jordan	2012	DHS	Q2 - 2 rural	99.9346
Jordan	2012	DHS	Q3 - 1 urban	100
Jordan	2012	DHS	Q3 - 2 rural	100
Jordan	2012	DHS	Q4 - 1 urban	99.0866
Jordan	2012	DHS	Q4 - 2 rural	100
Jordan	2012	DHS	Q5 - 1 urban	100
Jordan	2012	DHS	Q5 - 2 rural	100
Kazakhstan	2015	MICS	Q1 - 1 urban	100
Kazakhstan	2015	MICS	Q1 - 2 rural	99.5869
Kazakhstan	2015	MICS	Q2 - 1 urban	98.4542
Kazakhstan	2015	MICS	Q2 - 2 rural	99.1511
Kazakhstan	2015	MICS	Q3 - 1 urban	99.6423
Kazakhstan	2015	MICS	Q3 - 2 rural	99.3012
Kazakhstan	2015	MICS	Q4 - 1 urban	99.1553
Kazakhstan	2015	MICS	Q4 - 2 rural	98.1744
Kazakhstan	2015	MICS	Q5 - 1 urban	99.6683
Kazakhstan	2015	MICS	Q5 - 2 rural	100
Kenya	2014	DHS	Q1 - 1 urban	47.99
Kenya	2014	DHS	Q1 - 2 rural	32.5932
Kenya	2014	DHS	Q2 - 1 urban	66.016
Kenya	2014	DHS	Q2 - 2 rural	52.1894
Kenya	2014	DHS	Q3 - 1 urban	66.1063
Kenya	2014	DHS	Q3 - 2 rural	66.7247
Kenya	2014	DHS	Q4 - 1 urban	85.9525
Kenya	2014	DHS	Q4 - 2 rural	82.1667
Kenya	2014	DHS	Q5 - 1 urban	93.8022
Kenya	2014	DHS	Q5 - 2 rural	85.2424
Kosovo	2013	MICS	Q1 - 1 urban	95.2211
Kosovo	2013	MICS	Q1 - 2 rural	98.1626
Kosovo	2013	MICS	Q2 - 1 urban	100
Kosovo	2013	MICS	Q2 - 2 rural	99.0249
Kosovo	2013	MICS	Q3 - 1 urban	100
Kosovo	2013	MICS	Q3 - 2 rural	100
Kosovo	2013	MICS	Q4 - 1 urban	97.6132
Kosovo	2013	MICS	Q4 - 2 rural	100
Kosovo	2013	MICS	Q5 - 1 urban	100
Kosovo	2013	MICS	Q5 - 2 rural	100
Kyrgyzstan	2014	MICS	Q1 - 1 urban	100
Kyrgyzstan	2014	MICS	Q1 - 2 rural	96.1803
Kyrgyzstan	2014	MICS	Q2 - 1 urban	100
Kyrgyzstan	2014	MICS	Q2 - 2 rural	98.8193
Kyrgyzstan	2014	MICS	Q3 - 1 urban	100
Kyrgyzstan	2014	MICS	Q3 - 2 rural	98.5789
Kyrgyzstan	2014	MICS	Q4 - 1 urban	98.9706
Kyrgyzstan	2014	MICS	Q4 - 2 rural	98.0479
Kyrgyzstan	2014	MICS	Q5 - 1 urban	99.2495
Kyrgyzstan	2014	MICS	Q5 - 2 rural	98.8649
Lao	2011	MICS	Q1 - 1 urban	39.6474
Lao	2011	MICS	Q1 - 2 rural	9.88512
Lao	2011	MICS	Q2 - 1 urban	41.4135
Lao	2011	MICS	Q2 - 2 rural	22.5464
Lao	2011	MICS	Q3 - 1 urban	60.0397
Lao	2011	MICS	Q3 - 2 rural	42.316
Lao	2011	MICS	Q4 - 1 urban	76.1728
Lao	2011	MICS	Q4 - 2 rural	58.0426
Lao	2011	MICS	Q5 - 1 urban	94.6119
Lao	2011	MICS	Q5 - 2 rural	81.1342
Lesotho	2014	DHS	Q1 - 1 urban	100
Lesotho	2014	DHS	Q1 - 2 rural	65.0722
Lesotho	2014	DHS	Q2 - 1 urban	55.639
Lesotho	2014	DHS	Q2 - 2 rural	73.0635
Lesotho	2014	DHS	Q3 - 1 urban	66.4706
Lesotho	2014	DHS	Q3 - 2 rural	86.0996
Lesotho	2014	DHS	Q4 - 1 urban	95.0373
Lesotho	2014	DHS	Q4 - 2 rural	86.0137
Lesotho	2014	DHS	Q5 - 1 urban	94.5943
Lesotho	2014	DHS	Q5 - 2 rural	93.8226
Liberia	2013	DHS	Q1 - 1 urban	60.627
Liberia	2013	DHS	Q1 - 2 rural	44.1439
Liberia	2013	DHS	Q2 - 1 urban	54.5293
Liberia	2013	DHS	Q2 - 2 rural	56.9322
Liberia	2013	DHS	Q3 - 1 urban	63.5771
Liberia	2013	DHS	Q3 - 2 rural	64.0692
Liberia	2013	DHS	Q4 - 1 urban	78.5954
Liberia	2013	DHS	Q4 - 2 rural	75.5681
Liberia	2013	DHS	Q5 - 1 urban	88.8185
Liberia	2013	DHS	Q5 - 2 rural	86.943
Macedonia	2011	MICS	Q1 - 1 urban	100
Macedonia	2011	MICS	Q1 - 2 rural	97.1597
Macedonia	2011	MICS	Q2 - 1 urban	93.2253
Macedonia	2011	MICS	Q2 - 2 rural	97.6579
Macedonia	2011	MICS	Q3 - 1 urban	100
Macedonia	2011	MICS	Q3 - 2 rural	100
Macedonia	2011	MICS	Q4 - 1 urban	100
Macedonia	2011	MICS	Q4 - 2 rural	100
Macedonia	2011	MICS	Q5 - 1 urban	97.7206
Macedonia	2011	MICS	Q5 - 2 rural	100
Malawi	2015	MICS	Q1 - 1 urban	77.2
Malawi	2015	MICS	Q1 - 2 rural	87.8
Malawi	2015	MICS	Q2 - 1 urban	86.8
Malawi	2015	MICS	Q2 - 2 rural	90
Malawi	2015	MICS	Q3 - 1 urban	92.7
Malawi	2015	MICS	Q3 - 2 rural	89.7
Malawi	2015	MICS	Q4 - 1 urban	94.7
Malawi	2015	MICS	Q4 - 2 rural	92.5
Malawi	2015	MICS	Q5 - 1 urban	96.2
Malawi	2015	MICS	Q5 - 2 rural	94.1
Mali	2012	DHS	Q1 - 1 urban	0
Mali	2012	DHS	Q1 - 2 rural	37.8523
Mali	2012	DHS	Q2 - 1 urban	61.4137
Mali	2012	DHS	Q2 - 2 rural	47.2422
Mali	2012	DHS	Q3 - 1 urban	59.1763
Mali	2012	DHS	Q3 - 2 rural	52.4732
Mali	2012	DHS	Q4 - 1 urban	90.6626
Mali	2012	DHS	Q4 - 2 rural	73.9455
Mali	2012	DHS	Q5 - 1 urban	96.3401
Mali	2012	DHS	Q5 - 2 rural	88.7518
Mauritania	2011	MICS	Q1 - 1 urban	56.7123
Mauritania	2011	MICS	Q1 - 2 rural	26.1572
Mauritania	2011	MICS	Q2 - 1 urban	62.6596
Mauritania	2011	MICS	Q2 - 2 rural	43.8197
Mauritania	2011	MICS	Q3 - 1 urban	76.1922
Mauritania	2011	MICS	Q3 - 2 rural	68.9872
Mauritania	2011	MICS	Q4 - 1 urban	90.5613
Mauritania	2011	MICS	Q4 - 2 rural	86.1793
Mauritania	2011	MICS	Q5 - 1 urban	95.8851
Mauritania	2011	MICS	Q5 - 2 rural	96.9213
Mexico	2015	MICS	Q1 - 1 urban	96.5226
Mexico	2015	MICS	Q1 - 2 rural	89.3216
Mexico	2015	MICS	Q2 - 1 urban	99.5262
Mexico	2015	MICS	Q2 - 2 rural	100
Mexico	2015	MICS	Q3 - 1 urban	99.7454
Mexico	2015	MICS	Q3 - 2 rural	99.1933
Mexico	2015	MICS	Q4 - 1 urban	99.177
Mexico	2015	MICS	Q4 - 2 rural	100
Mexico	2015	MICS	Q5 - 1 urban	99.7946
Mexico	2015	MICS	Q5 - 2 rural	100
Moldova	2012	MICS	Q1 - 1 urban	100
Moldova	2012	MICS	Q1 - 2 rural	97.4456
Moldova	2012	MICS	Q2 - 1 urban	100
Moldova	2012	MICS	Q2 - 2 rural	100
Moldova	2012	MICS	Q3 - 1 urban	100
Moldova	2012	MICS	Q3 - 2 rural	100
Moldova	2012	MICS	Q4 - 1 urban	98.98
Moldova	2012	MICS	Q4 - 2 rural	100
Moldova	2012	MICS	Q5 - 1 urban	99.5592
Moldova	2012	MICS	Q5 - 2 rural	93.5721
Mongolia	2013	MICS	Q1 - 1 urban	100
Mongolia	2013	MICS	Q1 - 2 rural	97.0056
Mongolia	2013	MICS	Q2 - 1 urban	99.4734
Mongolia	2013	MICS	Q2 - 2 rural	99.3296
Mongolia	2013	MICS	Q3 - 1 urban	98.693
Mongolia	2013	MICS	Q3 - 2 rural	97.3735
Mongolia	2013	MICS	Q4 - 1 urban	98.3305
Mongolia	2013	MICS	Q4 - 2 rural	100
Mongolia	2013	MICS	Q5 - 1 urban	98.6384
Mongolia	2013	MICS	Q5 - 2 rural	100
Montenegro	2013	MICS	Q1 - 1 urban	100
Montenegro	2013	MICS	Q1 - 2 rural	98.3649
Montenegro	2013	MICS	Q2 - 1 urban	100
Montenegro	2013	MICS	Q2 - 2 rural	100
Montenegro	2013	MICS	Q3 - 1 urban	97.9981
Montenegro	2013	MICS	Q3 - 2 rural	100
Montenegro	2013	MICS	Q4 - 1 urban	97.8621
Montenegro	2013	MICS	Q4 - 2 rural	100
Montenegro	2013	MICS	Q5 - 1 urban	100
Montenegro	2013	MICS	Q5 - 2 rural	100
Mozambique	2011	DHS	Q1 - 1 urban	49.7755
Mozambique	2011	DHS	Q1 - 2 rural	32.6069
Mozambique	2011	DHS	Q2 - 1 urban	59.5994
Mozambique	2011	DHS	Q2 - 2 rural	38.3252
Mozambique	2011	DHS	Q3 - 1 urban	65.7922
Mozambique	2011	DHS	Q3 - 2 rural	50.8703
Mozambique	2011	DHS	Q4 - 1 urban	82.3489
Mozambique	2011	DHS	Q4 - 2 rural	70.8359
Mozambique	2011	DHS	Q5 - 1 urban	90.8952
Mozambique	2011	DHS	Q5 - 2 rural	89.4538
Myanmar	2015	DHS	Q1 - 1 urban	48.7747
Myanmar	2015	DHS	Q1 - 2 rural	39.1315
Myanmar	2015	DHS	Q2 - 1 urban	73.8509
Myanmar	2015	DHS	Q2 - 2 rural	54.2067
Myanmar	2015	DHS	Q3 - 1 urban	76.8814
Myanmar	2015	DHS	Q3 - 2 rural	68.7562
Myanmar	2015	DHS	Q4 - 1 urban	86.8699
Myanmar	2015	DHS	Q4 - 2 rural	79.4632
Myanmar	2015	DHS	Q5 - 1 urban	99.6582
Myanmar	2015	DHS	Q5 - 2 rural	94.6347
Namibia	2013	DHS	Q1 - 1 urban	77.2797
Namibia	2013	DHS	Q1 - 2 rural	75.6566
Namibia	2013	DHS	Q2 - 1 urban	96.8984
Namibia	2013	DHS	Q2 - 2 rural	85.143
Namibia	2013	DHS	Q3 - 1 urban	91.1002
Namibia	2013	DHS	Q3 - 2 rural	87.6692
Namibia	2013	DHS	Q4 - 1 urban	96.4278
Namibia	2013	DHS	Q4 - 2 rural	92.7795
Namibia	2013	DHS	Q5 - 1 urban	98.3569
Namibia	2013	DHS	Q5 - 2 rural	98.7069
Nepal	2014	MICS	Q1 - 1 urban	58.5054
Nepal	2014	MICS	Q1 - 2 rural	24.3322
Nepal	2014	MICS	Q2 - 1 urban	80.0085
Nepal	2014	MICS	Q2 - 2 rural	43.5039
Nepal	2014	MICS	Q3 - 1 urban	69.8987
Nepal	2014	MICS	Q3 - 2 rural	55.0955
Nepal	2014	MICS	Q4 - 1 urban	84.6593
Nepal	2014	MICS	Q4 - 2 rural	68.6336
Nepal	2014	MICS	Q5 - 1 urban	99.7529
Nepal	2014	MICS	Q5 - 2 rural	87.6178
Niger	2012	DHS	Q1 - 1 urban	17.8485
Niger	2012	DHS	Q1 - 2 rural	13.9627
Niger	2012	DHS	Q2 - 1 urban	100
Niger	2012	DHS	Q2 - 2 rural	22.1061
Niger	2012	DHS	Q3 - 1 urban	69.1539
Niger	2012	DHS	Q3 - 2 rural	23.9088
Niger	2012	DHS	Q4 - 1 urban	69.0679
Niger	2012	DHS	Q4 - 2 rural	28.4963
Niger	2012	DHS	Q5 - 1 urban	88.3264
Niger	2012	DHS	Q5 - 2 rural	47.2171
Nigeria	2013	DHS	Q1 - 1 urban	31.1503
Nigeria	2013	DHS	Q1 - 2 rural	4.72566
Nigeria	2013	DHS	Q2 - 1 urban	39.1009
Nigeria	2013	DHS	Q2 - 2 rural	16.4489
Nigeria	2013	DHS	Q3 - 1 urban	45.4731
Nigeria	2013	DHS	Q3 - 2 rural	38.2499
Nigeria	2013	DHS	Q4 - 1 urban	65.944
Nigeria	2013	DHS	Q4 - 2 rural	59.9699
Nigeria	2013	DHS	Q5 - 1 urban	87.5713
Nigeria	2013	DHS	Q5 - 2 rural	77.9495
Pakistan	2012	DHS	Q1 - 1 urban	34.1457
Pakistan	2012	DHS	Q1 - 2 rural	34.036
Pakistan	2012	DHS	Q2 - 1 urban	50.4178
Pakistan	2012	DHS	Q2 - 2 rural	42.8526
Pakistan	2012	DHS	Q3 - 1 urban	52.7298
Pakistan	2012	DHS	Q3 - 2 rural	56.2293
Pakistan	2012	DHS	Q4 - 1 urban	71.4299
Pakistan	2012	DHS	Q4 - 2 rural	74.3424
Pakistan	2012	DHS	Q5 - 1 urban	85.8926
Pakistan	2012	DHS	Q5 - 2 rural	85.2264
Panama	2013	MICS	Q1 - 1 urban	98.7609
Panama	2013	MICS	Q1 - 2 rural	67.3222
Panama	2013	MICS	Q2 - 1 urban	99.3906
Panama	2013	MICS	Q2 - 2 rural	98.3893
Panama	2013	MICS	Q3 - 1 urban	99.8257
Panama	2013	MICS	Q3 - 2 rural	100
Panama	2013	MICS	Q4 - 1 urban	100
Panama	2013	MICS	Q4 - 2 rural	95.7476
Panama	2013	MICS	Q5 - 1 urban	100
Panama	2013	MICS	Q5 - 2 rural	100
Peru	2012	DHS	Q1 - 1 urban	73.5298
Peru	2012	DHS	Q1 - 2 rural	63.3702
Peru	2012	DHS	Q2 - 1 urban	90.901
Peru	2012	DHS	Q2 - 2 rural	85.9309
Peru	2012	DHS	Q3 - 1 urban	97.4957
Peru	2012	DHS	Q3 - 2 rural	97.3537
Peru	2012	DHS	Q4 - 1 urban	99.4634
Peru	2012	DHS	Q4 - 2 rural	91.2493
Peru	2012	DHS	Q5 - 1 urban	99.5287
Peru	2012	DHS	Q5 - 2 rural	100
Philippines	2013	DHS	Q1 - 1 urban	49.4308
Philippines	2013	DHS	Q1 - 2 rural	45.7443
Philippines	2013	DHS	Q2 - 1 urban	73.9324
Philippines	2013	DHS	Q2 - 2 rural	74.3579
Philippines	2013	DHS	Q3 - 1 urban	86.1891
Philippines	2013	DHS	Q3 - 2 rural	84.9931
Philippines	2013	DHS	Q4 - 1 urban	95.449
Philippines	2013	DHS	Q4 - 2 rural	92.3182
Philippines	2013	DHS	Q5 - 1 urban	97.2707
Philippines	2013	DHS	Q5 - 2 rural	96.2562
Rwanda	2014	DHS	Q1 - 1 urban	88.1147
Rwanda	2014	DHS	Q1 - 2 rural	86.0283
Rwanda	2014	DHS	Q2 - 1 urban	94.307
Rwanda	2014	DHS	Q2 - 2 rural	90.9142
Rwanda	2014	DHS	Q3 - 1 urban	98.3026
Rwanda	2014	DHS	Q3 - 2 rural	91.7372
Rwanda	2014	DHS	Q4 - 1 urban	95.244
Rwanda	2014	DHS	Q4 - 2 rural	93.6187
Rwanda	2014	DHS	Q5 - 1 urban	97.9267
Rwanda	2014	DHS	Q5 - 2 rural	96.8157
Saint Lucia	2012	MICS	Q1 - 1 urban	100
Saint Lucia	2012	MICS	Q1 - 2 rural	91.7553
Saint Lucia	2012	MICS	Q2 - 1 urban	100
Saint Lucia	2012	MICS	Q2 - 2 rural	100
Saint Lucia	2012	MICS	Q3 - 1 urban	100
Saint Lucia	2012	MICS	Q3 - 2 rural	100
Saint Lucia	2012	MICS	Q4 - 1 urban	100
Saint Lucia	2012	MICS	Q4 - 2 rural	100
Saint Lucia	2012	MICS	Q5 - 1 urban	100
Saint Lucia	2012	MICS	Q5 - 2 rural	100
Sao Tome and Principe	2014	MICS	Q1 - 1 urban	89.2506
Sao Tome and Principe	2014	MICS	Q1 - 2 rural	79.4895
Sao Tome and Principe	2014	MICS	Q2 - 1 urban	96.9278
Sao Tome and Principe	2014	MICS	Q2 - 2 rural	87.5692
Sao Tome and Principe	2014	MICS	Q3 - 1 urban	92.3823
Sao Tome and Principe	2014	MICS	Q3 - 2 rural	91.9724
Sao Tome and Principe	2014	MICS	Q4 - 1 urban	95.7391
Sao Tome and Principe	2014	MICS	Q4 - 2 rural	97.1271
Sao Tome and Principe	2014	MICS	Q5 - 1 urban	98.126
Sao Tome and Principe	2014	MICS	Q5 - 2 rural	91.2998
Senegal	2015	DHS	Q1 - 1 urban	53.2455
Senegal	2015	DHS	Q1 - 2 rural	29.9397
Senegal	2015	DHS	Q2 - 1 urban	62.3307
Senegal	2015	DHS	Q2 - 2 rural	44.6702
Senegal	2015	DHS	Q3 - 1 urban	65.2555
Senegal	2015	DHS	Q3 - 2 rural	55.6002
Senegal	2015	DHS	Q4 - 1 urban	64.6236
Senegal	2015	DHS	Q4 - 2 rural	69.1564
Senegal	2015	DHS	Q5 - 1 urban	79.9076
Senegal	2015	DHS	Q5 - 2 rural	75.034
Serbia	2014	MICS	Q1 - 1 urban	100
Serbia	2014	MICS	Q1 - 2 rural	96.4111
Serbia	2014	MICS	Q2 - 1 urban	100
Serbia	2014	MICS	Q2 - 2 rural	100
Serbia	2014	MICS	Q3 - 1 urban	100
Serbia	2014	MICS	Q3 - 2 rural	100
Serbia	2014	MICS	Q4 - 1 urban	99.7769
Serbia	2014	MICS	Q4 - 2 rural	100
Serbia	2014	MICS	Q5 - 1 urban	94.4947
Serbia	2014	MICS	Q5 - 2 rural	100
Sierra Leone	2013	DHS	Q1 - 1 urban	48.2659
Sierra Leone	2013	DHS	Q1 - 2 rural	53.4532
Sierra Leone	2013	DHS	Q2 - 1 urban	56.4507
Sierra Leone	2013	DHS	Q2 - 2 rural	55.01
Sierra Leone	2013	DHS	Q3 - 1 urban	71.9113
Sierra Leone	2013	DHS	Q3 - 2 rural	55.7917
Sierra Leone	2013	DHS	Q4 - 1 urban	78.6019
Sierra Leone	2013	DHS	Q4 - 2 rural	65.2107
Sierra Leone	2013	DHS	Q5 - 1 urban	86.0578
Sierra Leone	2013	DHS	Q5 - 2 rural	66.8623
South Sudan	2010	MICS	Q1 - 1 urban	14.7481
South Sudan	2010	MICS	Q1 - 2 rural	7.26334
South Sudan	2010	MICS	Q2 - 1 urban	12.0262
South Sudan	2010	MICS	Q2 - 2 rural	8.9848
South Sudan	2010	MICS	Q3 - 1 urban	18.5336
South Sudan	2010	MICS	Q3 - 2 rural	12.1975
South Sudan	2010	MICS	Q4 - 1 urban	26.8959
South Sudan	2010	MICS	Q4 - 2 rural	21.5762
South Sudan	2010	MICS	Q5 - 1 urban	45.9758
South Sudan	2010	MICS	Q5 - 2 rural	35.7241
State of Palestine	2014	MICS	Q1 - 1 urban	99.699
State of Palestine	2014	MICS	Q1 - 2 rural	100
State of Palestine	2014	MICS	Q2 - 1 urban	99.2399
State of Palestine	2014	MICS	Q2 - 2 rural	100
State of Palestine	2014	MICS	Q3 - 1 urban	99.5556
State of Palestine	2014	MICS	Q3 - 2 rural	99.3861
State of Palestine	2014	MICS	Q4 - 1 urban	100
State of Palestine	2014	MICS	Q4 - 2 rural	99.3907
State of Palestine	2014	MICS	Q5 - 1 urban	99.258
State of Palestine	2014	MICS	Q5 - 2 rural	100
Sudan	2014	MICS	Q1 - 1 urban	50.6388
Sudan	2014	MICS	Q1 - 2 rural	47.618
Sudan	2014	MICS	Q2 - 1 urban	81.91
Sudan	2014	MICS	Q2 - 2 rural	68.6201
Sudan	2014	MICS	Q3 - 1 urban	91.0286
Sudan	2014	MICS	Q3 - 2 rural	80.661
Sudan	2014	MICS	Q4 - 1 urban	93.9564
Sudan	2014	MICS	Q4 - 2 rural	95.0368
Sudan	2014	MICS	Q5 - 1 urban	96.8628
Sudan	2014	MICS	Q5 - 2 rural	95.2345
Suriname	2010	MICS	Q1 - 1 urban	96.1624
Suriname	2010	MICS	Q1 - 2 rural	80.2381
Suriname	2010	MICS	Q2 - 1 urban	93.3285
Suriname	2010	MICS	Q2 - 2 rural	94.8646
Suriname	2010	MICS	Q3 - 1 urban	97.9821
Suriname	2010	MICS	Q3 - 2 rural	98.4351
Suriname	2010	MICS	Q4 - 1 urban	98.8469
Suriname	2010	MICS	Q4 - 2 rural	97.7728
Suriname	2010	MICS	Q5 - 1 urban	96.0462
Suriname	2010	MICS	Q5 - 2 rural	100
Swaziland	2014	MICS	Q1 - 1 urban	76.0734
Swaziland	2014	MICS	Q1 - 2 rural	76.3538
Swaziland	2014	MICS	Q2 - 1 urban	96.2192
Swaziland	2014	MICS	Q2 - 2 rural	85.8854
Swaziland	2014	MICS	Q3 - 1 urban	85.9743
Swaziland	2014	MICS	Q3 - 2 rural	91.3056
Swaziland	2014	MICS	Q4 - 1 urban	97.3621
Swaziland	2014	MICS	Q4 - 2 rural	93.1539
Swaziland	2014	MICS	Q5 - 1 urban	93.6138
Swaziland	2014	MICS	Q5 - 2 rural	98.8374
Tajikistan	2012	DHS	Q1 - 1 urban	90.9165
Tajikistan	2012	DHS	Q1 - 2 rural	73.3554
Tajikistan	2012	DHS	Q2 - 1 urban	96.3651
Tajikistan	2012	DHS	Q2 - 2 rural	86.2925
Tajikistan	2012	DHS	Q3 - 1 urban	91.051
Tajikistan	2012	DHS	Q3 - 2 rural	91.6753
Tajikistan	2012	DHS	Q4 - 1 urban	91.5339
Tajikistan	2012	DHS	Q4 - 2 rural	95.4573
Tajikistan	2012	DHS	Q5 - 1 urban	96.2613
Tajikistan	2012	DHS	Q5 - 2 rural	98.2775
Tanzania	2015	DHS	Q1 - 1 urban	50.687
Tanzania	2015	DHS	Q1 - 2 rural	43.0253
Tanzania	2015	DHS	Q2 - 1 urban	67.9622
Tanzania	2015	DHS	Q2 - 2 rural	52.2751
Tanzania	2015	DHS	Q3 - 1 urban	72.3377
Tanzania	2015	DHS	Q3 - 2 rural	61.2181
Tanzania	2015	DHS	Q4 - 1 urban	84.5145
Tanzania	2015	DHS	Q4 - 2 rural	77.1942
Tanzania	2015	DHS	Q5 - 1 urban	96.5838
Tanzania	2015	DHS	Q5 - 2 rural	93.0878
Thailand	2012	MICS	Q1 - 1 urban	96.153
Thailand	2012	MICS	Q1 - 2 rural	99.1088
Thailand	2012	MICS	Q2 - 1 urban	100
Thailand	2012	MICS	Q2 - 2 rural	99.4915
Thailand	2012	MICS	Q3 - 1 urban	100
Thailand	2012	MICS	Q3 - 2 rural	100
Thailand	2012	MICS	Q4 - 1 urban	99.62
Thailand	2012	MICS	Q4 - 2 rural	99.6992
Thailand	2012	MICS	Q5 - 1 urban	99.857
Thailand	2012	MICS	Q5 - 2 rural	100
Togo	2013	DHS	Q1 - 1 urban	45.6257
Togo	2013	DHS	Q1 - 2 rural	27.6753
Togo	2013	DHS	Q2 - 1 urban	57.9916
Togo	2013	DHS	Q2 - 2 rural	38.6774
Togo	2013	DHS	Q3 - 1 urban	68.1694
Togo	2013	DHS	Q3 - 2 rural	57.6887
Togo	2013	DHS	Q4 - 1 urban	92.52
Togo	2013	DHS	Q4 - 2 rural	79.0883
Togo	2013	DHS	Q5 - 1 urban	96.1235
Togo	2013	DHS	Q5 - 2 rural	100
Tunisia	2011	MICS	Q1 - 1 urban	97.2684
Tunisia	2011	MICS	Q1 - 2 rural	93.0011
Tunisia	2011	MICS	Q2 - 1 urban	100
Tunisia	2011	MICS	Q2 - 2 rural	99.595
Tunisia	2011	MICS	Q3 - 1 urban	100
Tunisia	2011	MICS	Q3 - 2 rural	100
Tunisia	2011	MICS	Q4 - 1 urban	99.7801
Tunisia	2011	MICS	Q4 - 2 rural	100
Tunisia	2011	MICS	Q5 - 1 urban	99.623
Tunisia	2011	MICS	Q5 - 2 rural	100
Turkmenistan	2015	MICS	Q1 - 1 urban	100
Turkmenistan	2015	MICS	Q1 - 2 rural	100
Turkmenistan	2015	MICS	Q2 - 1 urban	100
Turkmenistan	2015	MICS	Q2 - 2 rural	100
Turkmenistan	2015	MICS	Q3 - 1 urban	100
Turkmenistan	2015	MICS	Q3 - 2 rural	100
Turkmenistan	2015	MICS	Q4 - 1 urban	100
Turkmenistan	2015	MICS	Q4 - 2 rural	100
Turkmenistan	2015	MICS	Q5 - 1 urban	100
Turkmenistan	2015	MICS	Q5 - 2 rural
Uganda	2011	DHS	Q1 - 1 urban	85.5396
Uganda	2011	DHS	Q1 - 2 rural	43.8766
Uganda	2011	DHS	Q2 - 1 urban	69.4969
Uganda	2011	DHS	Q2 - 2 rural	50.8722
Uganda	2011	DHS	Q3 - 1 urban	80.8575
Uganda	2011	DHS	Q3 - 2 rural	55.4431
Uganda	2011	DHS	Q4 - 1 urban	82.982
Uganda	2011	DHS	Q4 - 2 rural	58.9851
Uganda	2011	DHS	Q5 - 1 urban	92.3537
Uganda	2011	DHS	Q5 - 2 rural	84.5966
Ukraine	2012	MICS	Q1 - 1 urban	97.8134
Ukraine	2012	MICS	Q1 - 2 rural	99.768
Ukraine	2012	MICS	Q2 - 1 urban	97.4193
Ukraine	2012	MICS	Q2 - 2 rural	97.2661
Ukraine	2012	MICS	Q3 - 1 urban	99.2331
Ukraine	2012	MICS	Q3 - 2 rural	100
Ukraine	2012	MICS	Q4 - 1 urban	100
Ukraine	2012	MICS	Q4 - 2 rural	100
Ukraine	2012	MICS	Q5 - 1 urban	99.5015
Ukraine	2012	MICS	Q5 - 2 rural
Uruguay	2012	MICS	Q1 - 1 urban	99.4278
Uruguay	2012	MICS	Q1 - 2 rural	96.1757
Uruguay	2012	MICS	Q2 - 1 urban	95.4888
Uruguay	2012	MICS	Q2 - 2 rural	100
Uruguay	2012	MICS	Q3 - 1 urban	99.4878
Uruguay	2012	MICS	Q3 - 2 rural	100
Uruguay	2012	MICS	Q4 - 1 urban	100
Uruguay	2012	MICS	Q4 - 2 rural	0
Uruguay	2012	MICS	Q5 - 1 urban	98.1242
Uruguay	2012	MICS	Q5 - 2 rural
Vietnam	2013	MICS	Q1 - 1 urban	84.1152
Vietnam	2013	MICS	Q1 - 2 rural	72.5936
Vietnam	2013	MICS	Q2 - 1 urban	100
Vietnam	2013	MICS	Q2 - 2 rural	96.3667
Vietnam	2013	MICS	Q3 - 1 urban	100
Vietnam	2013	MICS	Q3 - 2 rural	99.6161
Vietnam	2013	MICS	Q4 - 1 urban	98.9137
Vietnam	2013	MICS	Q4 - 2 rural	99.1074
Vietnam	2013	MICS	Q5 - 1 urban	100
Vietnam	2013	MICS	Q5 - 2 rural	100
Yemen	2013	DHS	Q1 - 1 urban	57.2756
Yemen	2013	DHS	Q1 - 2 rural	20.1468
Yemen	2013	DHS	Q2 - 1 urban	65.5906
Yemen	2013	DHS	Q2 - 2 rural	31.533
Yemen	2013	DHS	Q3 - 1 urban	60.1604
Yemen	2013	DHS	Q3 - 2 rural	44.2612
Yemen	2013	DHS	Q4 - 1 urban	68.2613
Yemen	2013	DHS	Q4 - 2 rural	59.6227
Yemen	2013	DHS	Q5 - 1 urban	83.737
Yemen	2013	DHS	Q5 - 2 rural	76.7613
Zambia	2013	DHS	Q1 - 1 urban	66.973
Zambia	2013	DHS	Q1 - 2 rural	48.5657
Zambia	2013	DHS	Q2 - 1 urban	69.4465
Zambia	2013	DHS	Q2 - 2 rural	54.7089
Zambia	2013	DHS	Q3 - 1 urban	82.5943
Zambia	2013	DHS	Q3 - 2 rural	58.5067
Zambia	2013	DHS	Q4 - 1 urban	91.2079
Zambia	2013	DHS	Q4 - 2 rural	74.3904
Zambia	2013	DHS	Q5 - 1 urban	95.8998
Zambia	2013	DHS	Q5 - 2 rural	77.4532
8 countries excluded because of missings in at least one cell
